1

2

3 **An experimentally evolved variant of RsmA confirms its central role in the**

4 **control of *Pseudomonas aeruginosa* social motility**

5

6

7

8 Sophie Robitaille, Yossef López de los Santos, Marie-Christine Groleau, Fabrice Jean-Pierre#,

9 Nicolas Doucet, Jonathan Perreault, and Eric Déziel\*

10

11 Centre Armand-Frappier Santé Biotechnologie Institut national de la recherche scientifique

12 (INRS) Laval (Québec), H7V 1B7, Canada.

13

14 #Current address: Department of Microbiology and Immunology, Geisel School of Medicine at

15 Dartmouth, Hanover, New Hampshire, USA

16

17 \*Corresponding author : e-mail: [eric.deziel@iaf.inrs.ca](mailto:eric.deziel@iaf.inrs.ca)

18

19

20 **Short Title**

21 A RsmA spontaneous mutation restores  $\Delta hptB$  swarming defect

22

23

24

25

26

27

28

## 29 **Abstract**

30 Bacteria can colonize a variety of different environments by modulating their gene regulation  
31 using two-component systems. The versatile opportunistic pathogen *Pseudomonas aeruginosa*  
32 has been studied for its capacity to adapt to a broad range of environmental conditions. The  
33 Gac/Rsm pathway is composed of the sensor kinase GacS, that detects environmental cues, and  
34 the response regulator GacA, that modulates the expression of a specific genes. This system,  
35 through the sRNA repressors RsmY and RsmZ, negatively controls the activity of the protein  
36 RsmA, which is centrally involved in the transition from chronic to acute infections by post-  
37 transcriptionally regulating several virulence functions. RsmA positively regulates swarming  
38 motility, a social surface behaviour. Through a poorly defined mechanism, RsmA is also indirectly  
39 regulated by HptB, and a  $\Delta hptB$  mutant exhibits a severe swarming defect. Since a  $\Delta hptB$  mutant  
40 retains all the known functions required for that type of motility, we used an experimental  
41 evolution approach to identify elements responsible for its swarming defect. After a few passages  
42 under swarming conditions, the defect of the  $\Delta hptB$  mutant was rescued by the emergence of  
43 spontaneous single nucleotide substitutions in the *gacA* and *rsmA* genes. Since GacA indirectly  
44 represses RsmA activity, it was coherent that an inactivating mutation in *gacA* would compensate  
45 the  $\Delta hptB$  swarming defect. However, the effect of the mutation in *rsmA* was unexpected since  
46 RsmA promotes swarming; indeed, using expression reporters, we found that the mutation that  
47 does not abolish its activity. Instead, using electrophoretic mobility shift assays and molecular  
48 simulations, we show that this variant of RsmA is actually less amenable to titration by its cognate  
49 repressor RsmY, supporting the other phenotypes observed for this mutant. These results  
50 confirm the central role of RsmA as a regulator of swarming motility in *P. aeruginosa* and identify  
51 residues crucial for RsmA function in social motility.

52

53

## 54 **Author summary**

55 Bacteria need to readily adapt to their environment. Two-component systems (TCS) allow such  
56 adaption by triggering bacterial regulation changes through the detection of environmental cues.  
57 The opportunistic pathogen *Pseudomonas aeruginosa* possesses more than 60 TCS in its  
58 genome. The Gac/Rsm is a TCS extensively studied for its implication in virulence regulation.  
59 This system regulates the transition between chronic and acute bacterial infection behaviours . To  
60 acquire a better understanding of this regulation, we performed a directed experimental evolution  
61 on a swarming-deficient mutant in a poorly understood regulatory component of the Gac/Rsm  
62 pathway. We observed single nucleotide substitutions that allowed restoration of a swarming  
63 phenotype similar to the wild-type behaviour. More specifically, mutations were found in the *gacA*  
64 and *rsmA* genes. Interestingly, the observed mutation in *rsmA* does not result in loss of function  
65 of the protein but rather alters its susceptibility to repression by its cognate interfering sRNA.  
66 Since modification in the RNA sequence of RsmA results in the rescue of swarming motility, we  
67 confirm the central role of this posttranscriptional repressor in this social lifestyle.

68

69

## 70 **Introduction**

71 Bacteria can adapt to diverse environments using various mechanisms. They use two-component  
72 systems (TCS) to rapidly modulate the expression of specific subsets of genes (1). TCS convert  
73 external stimuli into an internal response that promotes adaptation to environmental cues. Some  
74 bacteria exploit these systems for virulence regulation (2). Typically, TCS consists of a histidine  
75 sensor kinase that responds to an external signal to trigger the autophosphorylation of an  
76 intracellular histidine residue. Then, the phosphoryl group of the sensor kinase is transferred to  
77 an aspartate residue located in the receiver domain of a cognate response regulator, which then  
78 modulates the expression of a specific set of target genes (3). In some cases, phosphorylation of  
79 the receiver domain can occur through a His-containing phosphotransfer (Hpt) protein that acts  
80 as an intermediate between the membrane sensor and the response regulator (4).

81

82 *Pseudomonas aeruginosa* is an opportunistic pathogen responsible for several nosocomial  
83 infections and also a major cause of morbidity and mortality among individuals with cystic fibrosis  
84 (5, 6). The genome of prototypical *P. aeruginosa* strain PAO1 contains 63 histidine kinases, 64  
85 response regulators, and three Hpt proteins (7). The Gac/Rsm pathway regulates, among others,  
86 virulence-associated genes, and biofilm formation (8). This pathway regulates the transition  
87 between chronic (associated with the sessile lifestyle) and acute (associated with the motile  
88 lifestyle) infections (9, 10). The Gac TCS is composed of the histidine sensor kinase GacS (11)  
89 and its cognate response regulator GacA. When GacS is phosphorylated, it transfers its  
90 phosphoryl group to GacA (12), promoting the transcription of the small RNAs (sRNA) RsmY and  
91 RsmZ (10). The expression levels of these sRNAs are influenced by bacterial culture conditions,  
92 either in broth or on a surface, highlighting the importance of this pathway in the regulation  
93 between these two modes of growth (13). HptB modulates the expression of RsmZ through an  
94 unknown surface-specific membrane sensor other than GacS, resulting in the phosphorylation of  
95 GacA and/or an uncharacterized regulatory factor (13). The sRNAs RsmY and RsmZ are  
96 repressors of the protein RsmA and act by reversibly titrating its activity (14-16). RsmA is a post-  
97 transcriptional regulator that binds to a specific trinucleotide GGA motif usually present in the

98 5'UTR of target mRNAs, thus preventing their translation (8, 17). RsmA inhibits genes associated  
99 with biofilm development and favors genes linked to acute infections (10). Also, RsmA is  
100 necessary for colonization in a murine infection model (18).

101

102 Swarming motility is a social surface motility behaviour utilized by several bacteria to promote the  
103 colonization of environments by coordinating the movement of a bacterial population on a semi-  
104 solid surface (19). Swarming cells require a functional rotating flagellum which gives them the  
105 necessary propelling power. They also need to produce surface-active agents reducing the  
106 surface tension between the substrate and the cell, thus facilitating the movement on the surface  
107 (19). Loss of RsmA or HptB functions leads to defects in swarming motility (13, 20, 21),  
108 highlighting the importance of this regulatory cascade in swarming regulation.

109

110 To date, no specific gene directly regulated by RsmA has been identified to explain the control of  
111 swarming motility. We have previously determined that the defect in swarming motility of a  $\Delta hptB$   
112 mutant is not due to either a lack of functional flagella or a deficit in surfactant production (13).  
113 Therefore, additional and still unknown elements are necessary for the swarming motility of *P.*  
114 *aeruginosa*. Since swarming motility is believed to be a beneficial phenotype, defective mutants  
115 should derive a selective benefit to regain social motility behaviour. Indeed, Boyle *et al.* (22)  
116 rescued the swarming motility of a *cbrA* mutant through directed experimental evolution. To test  
117 our hypothesis, we recently performed a similar experiment using directed swarming evolution on  
118 a  $\Delta hptB$  mutant of strain PA14 to identify unknown elements necessary for swarming motility (23).  
119 After four transfers corresponding to cell passages from the tips of swarming tendrils on new  
120 swarming plates, the swarming motility of  $\Delta hptB$  was restored (23). Among evolved gain-of-  
121 function clones, two distinct phenotypes emerged: (i) pyocyanin-overproducers with a partially  
122 restored swarming phenotype resulting from mutations in *lasR* (described in (23)); and (ii) clones  
123 expressing a completely restored swarming behaviour comparable to the parental strain PA14.  
124 The latter clones (named C2 and C4) are described and characterized here (Fig. 1 B-C); we  
125 found single nucleotide substitutions in the *rsmA* and *gacA* genes, further strengthening the

126 importance of the Gac/Rsm pathway in the regulation of surface social behaviour in *P.*  
127 *aeruginosa*. In particular, this experimental evolution experiment revealed residues crucial for  
128 RsmA interaction with RNA.

129

## 130 **Results:**

### 131 **Evolution of the $\Delta hptB$ mutant restores swarming phenotype by** 132 **selecting mutations in the Gac/Rsm regulatory pathway**

133

134 We previously reported a directed swarming evolution experiment on the  $\Delta hptB$  mutant of *P.*  
135 *aeruginosa* PA14 to identify elements capable of restoring a swarming phenotype similar to wild-  
136 type (23). Two different groups of clones had partially or completely restored swarming abilities.  
137 Thus, the evolved  $\Delta hptB$  clones acquired compensatory mutations. We previously reported that  
138 mutations in *lasR* characterized the partially recovered mutants (23). Here, we focus on mutations  
139 involved in the complete recovery of swarming motility of the  $\Delta hptB$  mutant. Whole-genome  
140 sequencing was performed on clones C2 and C4, which completely regained their swarming  
141 phenotype (**Fig. 1**) (23). Clone C4 has a single non-synonymous point mutation in the *gacA* gene  
142 (PA14\_30650), resulting in a substitution at residue 90 (c.268C>T; proline to serine (p.P90S))  
143 when compared to the parental  $\Delta hptB$  protein sequence. Clone C2 carries a mutation (c.91C>A)  
144 in the *rsmA* gene (PA14\_52570), resulting in an arginine to serine substitution at position 31 of  
145 the protein sequence (p.R31S) when compared to the parental  $\Delta hptB$  genome sequence. No  
146 additional mutations were identified in these two clones.

147

148 Given the emergence of non-synonymous mutations in the *gacA* and *rsmA* genes (clones C4 and  
149 C2, respectively) after repeated passages of the  $\Delta hptB$  isogenic strain to select for a recovered  
150 swarming phenotype, we verified whether the acquired mutations were responsible for the  
151 rescue. We first looked at the activity of GacA in the C4 clone. As shown in **figure 1B**,  
152 inactivation of *gacA* in a  $\Delta hptB$  strain restores the swarming phenotype. Accordingly, swarming of  
153 clone C4 is similar to that of  $\Delta gacA$  and  $\Delta hptB gacA$  mutants. Furthermore, we verified whether  
154 the activity of GacA is affected in clone C4 by looking at the transcription of its direct targets,

155 *rsmY* and *rsmZ* (**Fig. 2 and Fig. S1**). In agreement with a loss of GacA function, the transcription  
156 of both sRNAs is significantly lower in the evolved clone when compared to its parental  $\Delta hptB$   
157 background. Clone C4 shows no significant difference in expression of *rsmY* and *rsmZ* with the  
158  $\Delta gacA$  and  $\Delta hptBgacA$  mutants. Thus, these results demonstrate that clone C4 acquired an  
159 inactivating mutation in the GacA regulator, allowing for the rescue of the swarming defect in the  
160  $\Delta hptB$  parental strain.

161

162 We then looked at the effect of the *rsmA* mutation in the C2 clone. Loss of *hptB* or *rsmA* usually  
163 results in an important defect in swarming motility (**Fig. 1A-C**) (13, 21, 24), while a combination of  
164 both *rsmA* and *hptB* mutations results in a complete loss of coordinated social movement (**Fig.**  
165 **1C**). However, swarming was rescued in clone C2 (**Fig. 1C**). This was surprising given that the  
166 over-expression of RsmA in the  $\Delta hptB$  background also results in a rescue of the swarming  
167 phenotype (**Fig. S2**). Thus, we considered two possible explanations for these results: [1] the  
168 single nucleotide substitution in *rsmA* does not influence the function of RsmA, and another  
169 undetected mutation is responsible for the swarming recovery, or [2] the arginine-to-serine  
170 substitution in RsmA in the evolved clone C2 somehow increases the activity of this regulator. To  
171 verify the first possibility, which we thought very unlikely considering the high coverage of our  
172 genome sequencing, we looked at the complementation of a  $\Delta rsmA$  markerless mutant with a  
173 plasmid carrying the RsmA<sup>R31S</sup> substitution from clone C2 by measuring the transcription of *rsmY*.  
174 The transcription of *rsmY* and *rsmZ* are downregulated in a  $\Delta rsmA$  mutant background (15, 24).  
175 We observed that a plasmid-borne *rsmA*<sup>R31S</sup> can restore expression of *rsmY* in  $\Delta rsmA$ , although  
176 incompletely (**Fig. 3 and Fig. S3**). Thus, RsmA<sup>R31S</sup> is functional, but with a somewhat altered  
177 activity, indicating that the mutation in clone C2 does not result in abrogation of the activity of the  
178 protein. We then looked at the translation of *hcnA* mRNA transcripts, known to be directly  
179 repressed by RsmA (25, 26). Interestingly, we observed that the translation of *hcnA* is lower in  
180 the C2 clone compared to the  $\Delta hptBrsmA$  mutant, but similar to the wild-type strain (**Fig. 4A and**  
181 **Fig.S4A**). Thus, to further understand the impact of the observed non-synonymous mutation in  
182 the *rsmA* gene of clone C2, we looked at the transcription of *rsmY* and *rsmZ* (**Fig. 4 B-C and**

183 **Fig.S4B-C**). We observed that the C2 clone exhibits a higher expression of both sRNAs when  
184 compared to the  $\Delta rsmA$  and  $\Delta hptBrsmA$  mutants, while it is lower than in the  $\Delta hptB$  mutant.  
185 These results confirm that RsmA is still functional in clone C2. In fact, the RsmA regulatory  
186 activity of the evolved clone is similar to that of the wild-type PA14 strain (**Fig. 4 A-C**). Taken  
187 together, these data indicate that RsmA<sup>R31S</sup> is active in the C2 clone, but its function is altered  
188 when compared to wild-type RsmA. Importantly, RsmA<sup>R31S</sup> is able to rescue the swarming defect  
189 imposed by the loss of HptB.

190

### 191 **The R31S mutation alters RsmA affinity for RsmY**

192

193 One hypothesis to explain our observations is reduced binding affinity, and thus repression, of  
194 RsmA<sup>R31S</sup> activity by RsmY/Z. We first tested this hypothesis by building a molecular model of the  
195 RsmA-RsmY complex. This allowed us to evaluate the atomic-scale impact of the R31S mutation  
196 on the structure and binding energy of complex formation between WT RsmA and RsmA<sup>R31S</sup>. Our  
197 structural model suggests that the wild-type R31 residue is most likely involved in the stabilization  
198 of the U<sub>88</sub>A<sub>89</sub> nucleotide pair located downstream of the conserved GGA motif in RsmY.  
199 Replacing the long, charged, and flexible terminal guanidinium arginine moiety for the small and  
200 polar hydroxyl group of a serine side chain results in the loss of two key hydrogen bonding  
201 interactions between RsmA and RsmY (**Fig. 5**). In addition, increased local flexibility combined  
202 with perturbations in steric contacts and short-/long-range electrostatic interactions result in a  
203 total estimated energy penalty contribution of ~18 kcal/mol in variant RsmA<sup>R31S</sup> relative to wild-  
204 type RsmA. This energy penalty most likely results in important binding variability within the  
205 protein-ligand ensemble, especially considering that binding free energy ( $\Delta G$ ) values of 2-3  
206 kcal/mol are sufficient to impart significant alterations in protein-RNA interactions (27, 28).

207

208 We then used electrophoretic mobility shift assays (EMSA) to experimentally challenge this model  
209 and investigate interactions between wild-type and RsmA<sup>R31S</sup> upon RsmY binding (**Fig. 6**). Our  
210 EMSA results show that RsmA binds to RsmY and forms three different protein-RNA complexes,  
211 which are reflected by the known binding of several RsmA monomers to multiple binding sites on



212 a RsmY sRNA molecule (29, 30). The RsmY sRNA has seven GGA sites where RsmA can bind.  
213 The second, fifth and seventh binding sites are the most determinant for RsmA-RsmY complex  
214 formation (29). At tested RsmA concentrations where protein:RNA interactions are detected, both  
215 wild-type and RsmA<sup>R31S</sup> at the concentration of 0.05  $\mu$ M formed complex 1 (**Fig. 6B**). However,  
216 at higher concentrations, RsmA<sup>R31S</sup> can only form complex 2. In contrast, the wild-type protein  
217 was able to shift RsmY, forming complex 3, which was not observed for RsmA<sup>R31S</sup> at the same  
218 concentration (**Fig. 6A and Fig. S5**).

219

220 To confirm our observations, the radioactive intensity of each lane was measured for each  
221 section found in **figure 6 (A-B-C)** to quantify the three complexes. The intensity of each section  
222 was then divided by the total intensity of the lane (sum of intensities of sections A, B, C for each  
223 concentration) to determine the ratio of RNA for each section (**Fig. S6**). In section A, complex 3  
224 was found and could be quantified (**Fig. S6A**) while the first and second complexes were  
225 quantified in section B (**Fig. S6B**). Unbound RNAs were quantified in section C (**Fig. S6C**). These  
226 data demonstrate that RsmA<sup>R31S</sup> does not bind as well as wild-type RsmA to RsmY, which  
227 validates our *in silico* model and explains the results we observed for our *in vivo* assays.

228

## 229 **Discussion**

230 Here we used swarming motility as a model social phenotype to better understand the implication  
231 of HptB and the Gac/Rsm pathway in surface behavior of *P. aeruginosa*. The post-transcriptional  
232 regulator RsmA favors swarming motility and the acute mode of infection while repressing  
233 functions involved in the development of chronic infections, such as biofilms. Even though  
234 swarming is regulated inversely than biofilm formation, evidence suggests that swarming could  
235 play a role in early steps of biofilm development (31, 32). Furthermore, swarming cells are more  
236 resistant to antibiotics (33). Our previous report on the swarming-deficient *hptB* mutant  
237 demonstrated that flagellar motility and production of a wetting agent are not the only elements  
238 essential for swarming motility; using directed evolution of  $\Delta hptB$  under swarming conditions, we  
239 found that *lasR*-defective mutants partially regained the ability to swarm (23). Here, we

240 investigated a second group of mutants in the Gac/Rsm pathway that also arise in a  $\Delta hptB$   
241 background during experimental swarming evolution and that are fully rescued in their surface  
242 motility. One of these mutants (clone C4) had a modification in the *gacA* gene resulting in a  
243 protein with a deficient activity. Indeed, the transcription of both *rsmY* and *rsmZ* in clone C4 are at  
244 the same level as in a  $\Delta hptB gacA$ . This finding was not surprising, as we had previously found  
245 that loss of *rsmY* and *rsmZ*, which are the primary targets of GacA, completely rescues the  
246 swarming defect in a  $\Delta hptB$  background (34). Spontaneous mutations in the *gacA* and *gacS*  
247 genes have been previously well-documented in different *Pseudomonas* strains and various  
248 growth conditions (35-37), including in the context of swarming evolution experiments (36). The  
249 mutation found in *gacA* is located at a well-conserved position (38, 39) in the receiver domain  
250 next to the aspartic acid essential for GacS phosphorelay (39). Since the mutation led to a loss-  
251 of-function, it could prevent the phosphotransfer by the GacS sensor. Loss of GacA essentially  
252 abolishes *rsmY* and *rsmZ* expression, resulting in an increased availability of RsmA and thus  
253 increased repression of its multiple mRNA targets leading to an indirect promotion of swarming  
254 motility.

255

256 The experimental evolution with the  $\Delta hptB$  mutant also selected for a mutation in the *rsmA* gene  
257 which led to a restored swarming phenotype. This was completely unexpected since loss of  
258 RsmA activity decreases swarming motility (**Fig. 1C**) (24). A spontaneous mutation in that gene  
259 has never been reported. The best explanation for this surprising mutation was that RsmA has an  
260 altered protein activity caused by this single nucleotide substitution. In contrast with the  
261  $\Delta hptB rsmA$  and  $\Delta rsmA$  mutants, the evolved C2 clone is capable of a wild-type-like swarming,  
262 which further supports the observation that the mutation obtained in the evolved clones does not  
263 result in a non-functional protein. Those results also concur with *rsmY* and *rsmZ* expression  
264 assays: transcription of both sRNAs is lower in  $\Delta rsmA$  and  $\Delta hptB rsmA$  compared to PA14, but  
265 clone C2 is similar to PA14. The same observations were also made when looking at the  
266 translation of *hcnA*. These results support a model where the emergence of the single nucleotide  
267 substitution mutation in *rsmA* results in a modification rather than a loss of protein function.

268

269 To better understand how the emergence of a RsmA<sup>R31S</sup> substitution in the evolved  $\Delta hptB$  strain  
270 could rescue its swarming motility phenotype without affecting the expression of *rsmY* and *rsmZ*,  
271 we hypothesized that the affinity between RsmA<sup>R31S</sup> and target RNAs could be impacted. In  
272 *Escherichia coli* K12, a R31 substitution of CsrA (RsmA homolog) to alanine subtly affects the *in*  
273 *vivo* regulation of CsrA on target genes or phenotypes (40). However, this effect is not as  
274 important as observed with other neighboring residues. R31 is not strictly conserved between  
275 bacterial species, although positively charged residues are primarily found at this position  
276 (arginine, lysine, histidine) (40, 41) (**Fig. S7**). Residue R44 is involved in RNA interaction and R31  
277 most likely plays an important accessory role impacting binding affinity and/or ligand  
278 discrimination since it appears to stabilize the U<sub>88</sub>A<sub>89</sub> nucleotide pair located downstream of the  
279 conserved GGA motif in RsmY (**Fig. 5**). This positively charged residue is solvent-exposed and  
280 its interaction with RNA is mediated by two hydrogen bonds involving its terminal guanidinium  
281 moiety (40, 41). In contrast, the mutation in C2 introduces a serine instead of an arginine, leading  
282 to a small and polar residue unable to maintain these interactions, therefore affecting RNA  
283 binding affinity and/or discrimination.

284

285 We confirmed that RsmY affinity for RsmA with the R31S substitution is modified due to different  
286 RsmY mobility shift when interacting with either RsmA or RsmA<sup>R31S</sup> in EMSA experiments (**Fig.**  
287 **6**). The most probable interpretation is that the loss of interaction between the R31 residue and  
288 RNA reduces affinity for some binding sites, notably with GGUAU, such as in RsmY, as opposed  
289 to other sites. The complexes between sRNA and RsmA are the result of the multiple RsmA  
290 molecule binding to the different GGA motifs of RsmY (29). Even though both RsmA and  
291 RsmA<sup>R31S</sup> are capable of interacting with RsmY and forming Complex 1, only the wild-type protein  
292 can form Complex 3 which most likely represents a higher capacity to bind RsmY molecules  
293 compared to RsmA<sup>R31S</sup>. Indeed, this was confirmed when we looked at the radioactivity signal of  
294 the protein-RNA complexes; clearly, RsmA<sup>R31S</sup> does not bind as well as WT RsmA to RsmY (**Fig.**  
295 **S6A**). Affinity between RsmA<sup>R31S</sup> and RsmY shows that the inhibition by RsmY is not as efficient,

296 which supports the fact that the C2 clone exhibits similar activity as the wild-type protein (**Fig.**  
297 **4B**), but different than  $\Delta rsmA$  and  $\Delta hptBrsmA$ .

298

299 Our results indicate that RsmA inhibits, directly or indirectly, an unknown repressor impacting  
300 swarming motility. However, this repressing factor is still unknown, and it is thus not yet possible  
301 to test its activity with RsmA and RsmA<sup>R31S</sup> *in vitro*. RsmY has many RsmA binding sites and  
302 displays secondary structures with multiple stem-loops with RsmA binding sites (29). Depending  
303 on the different mRNAs that are controlled by RsmA, the number of available binding sites and/or  
304 secondary structures could probably affect the binding capacity between the protein and target  
305 RNAs. The RsmA:mRNA interaction of these RsmA-controlled mRNAs implicated in swarming  
306 motility could be less impacted by the mutation R31S than RsmY, due to their sequence and  
307 structure, and then explain the rescue of swarming in the  $\Delta hptB$  background. Also, additional  
308 elements such as chaperone Hfq, which can bind some mRNA transcripts that associate with  
309 RsmA, could contribute to RNA binding and were missing in our *in vitro* experiments (42).  
310 However, our data strongly support the fact that a modified RsmA binds RsmY less efficiently,  
311 impacting its inhibitory effect, which further explains the swarming rescue of the C2 clone.

312

313 We wanted to understand why the swarming population of an evolved  $\Delta hptB$  mutant selected for  
314 a spontaneous mutation in RsmA. HptB can inhibit *rsmZ* expression under swarming conditions  
315 independently of GacA (13) and also inhibits *rsmY* and *rsmZ* by indirectly influencing GacA. We  
316 can then hypothesize that a  $\Delta hptB$  favours the inhibition of RsmA by increasing expression of  
317 *rsmZ* and *rsmY* which could explain its lack of swarming. The RsmA mutation in the C2 evolved  
318 clone most likely results in lower affinity for RsmY and RsmZ, compensating for the  $\Delta hptB$   
319 mutation. The mutated RsmA version has lower *rsmZ* and *rsmY* expression than  $\Delta hptB$  mutants.  
320 This could explain the selection of a spontaneous mutant in our directed evolution experiment  
321 and thus the benefit of having a mutation that modifies RsmA activity. Additionally, although  
322 arginine is primarily found at position 31, we found two naturally occurring RsmA variants at this  
323 position in *P. aeruginosa* strains using BLAST (NCBI) (R31G and R31C). We aligned these

324 sequences (and other sequences of RsmA homologs in different strains) to PA14 RsmA  
325 sequence in a multiple sequence alignment to observe the variation found at position 31 (**Fig.**  
326 **S7**). This can indicate that naturally occurring RsmA can tolerate R31 replacements, although  
327 R31 is largely favored for optimal activity. Understanding this mutation could help identify the  
328 unknown element(s) necessary for swarming motility.

329

330 Previous experimental evolution on wild-type PA14 strain under swarming conditions did not  
331 reveal a mutation in *rsmA* (43, 44). Also, passaging  $\Delta hptB$  in liquid cultures did not result in a  
332 rescue of swarming motility (23). It is likely that the use of swarming conditions and a *hptB* mutant  
333 background have selected for the mutation in *rsmA*. Our results show the central role of RsmA in  
334 swarming regulation. Decreasing RsmA repression by its cognate sRNAs was the only evolved  
335 way to relieve sRNA-mediated repression of swarming in  $\Delta hptB$  mutant. We could achieve it  
336 through selective pressure forcing the  $\Delta hptB$  mutant to swarm; something that would have not  
337 been obtained if we had adopted a classical transposon mutagenesis screening approach where  
338 only loss-of-function mutants can result. We confirmed the role of RsmA as a master switch  
339 between bacterial acute (motile lifestyle) and chronic infection (sessile lifestyle) and identified a  
340 residue that is critical for its activity. Knowing this, we could now modulate its function by  
341 permitting a better adaptation to its environment. Even though RsmA regulates secondary  
342 metabolites, it could act as a target to inhibit biofilm formation.

343

## 344 **Materials and methods**

345

### 346 **Bacterial Strains and culture conditions**

347

348 *Pseudomonas aeruginosa* strain PA14 was used in this study (45). Details on the strains are  
349 found in **Table S1**. Conditions used for the directed evolution under swarming conditions was  
350 previously described (23). The bacteria were grown in Tryptic Soy Broth (TSB) (Difco) at 37°C in  
351 a TC-7 roller drum (New Brunswick) at 110 rpm unless otherwise specified. Swarming assays  
352 have been performed as previously described (46). Swarming plates containing 0.5% agar were

353 prepared and 5  $\mu$ l of a bacterial suspension at OD<sub>600</sub>=3.00 were inoculated. The plates were  
354 incubated at 34°C in bags for 20h or as indicated. For the swarming complementation  
355 experiment, the swarming plates were supplemented with 125  $\mu$ g/mL of tetracycline. Pictures  
356 were taken using a Lumix DMC-ZS60 camera (Panasonic). OD<sub>600</sub> measurements were taken  
357 using a Nanodrop ND-1000 (Thermo Fisher Scientific).

358

## 359 **Sequencing of the whole genome DNA**

360

361 The whole genome sequencing of C2 and C4 was obtained as previously described (23). The C2  
362 and C4 clones generated 2,862,314 and 3,254,964 reads respectively covering a 6M bp genome.  
363 Mutations were confirmed by PCR amplification (**Table S2**). Purified PCR fragments were sent to  
364 Institut de Recherches Cliniques de Montréal (Montréal, Canada) for Sanger Sequencing.  
365 RsmA/CsrA variants from other *P. aeruginosa* strains and other bacterial species were obtained  
366 by BLAST (NCBI <https://www.ncbi.nlm.nih.gov/>) and sequences aligned was performed through  
367 Clustal Omega 1.2.3 on Geneious Prime 2020.0 (Biomatters).

368

## 369 **Construction of markerless *rsmA* and *gacA* mutants**

370

371 The *rsmA* gene (PA14\_52570) was deleted at more than 95% using a two-step allelic exchange  
372 method (47). All primers are described in **Table S2**. The upstream region was amplified using  
373 RsmA-L-F-EcoRI and RsmA-L-R-homRsmA primers. The downstream fragment was amplified  
374 using primers RsmA-F-F and RsmA-R-R-HindIII. And the overlapping PCR was amplified using  
375 RsmA-L-F-EcoRI and RsmA-R-R-HindIII. The obtained fragment was ligated into pEX18-Ap. The  
376 obtained vector (pSR09) was transformed in conjugative *E. coli* SM10 and selected on Lysogeny  
377 Broth (LB) Miller's agar (Alpha Biosciences) containing 100  $\mu$ g/ml of carbenicillin. The allelic  
378 exchange was performed in PA14 and  $\Delta$ *hptB* by conjugation. Clones were selected on  
379 carbenicillin 300  $\mu$ g/ml and triclosan 25  $\mu$ g/ml. The double recombination was performed on no  
380 salt LB agar with the addition of 10% sucrose.

381

382 The same method was used for the deletion of the *gacA* (PA14\_30650) gene. Primers are listed  
383 in **Table S2**. The upstream region has been amplified using primers FJP\_UP\_*gacA*\_pEX\_For and  
384 FJP\_UP\_*gacA*\_pEX\_Rev. The downstream fragment has been amplified using  
385 FJP\_DN\_*gacA*\_pEX\_For and FJP\_DN\_*gacA*\_pEX\_Rev primers. The overlapping PCR was  
386 amplified with FJP\_UP\_*gacA*\_pEX\_For and FJP\_DN\_*gacA*\_pEX\_Rev. The obtained fragment  
387 was inserted in pEX18-*Ap*. The plasmid obtained (pFJP19) was transformed in SM10 and  
388 selected on LB agar with 50  $\mu$ g/ml carbenicillin. Allelic exchange in PA14 and  $\Delta$ *hptB* was  
389 performed as described (47).

390

### 391 **Construction of strains with gene expression reporters**

392 Two-partnered conjugation with SM10 containing pCTX-*rsmY* or pCTX-*rsmZ* was performed with  
393 *P. aeruginosa* strains. Clones were selected on 125  $\mu$ g/ml tetracycline and 25  $\mu$ g/ml triclosan.

394 Plasmid pME3826 was transformed by electroporation as described previously (48). Clones were  
395 selected on LB agar containing 125  $\mu$ g/ml of tetracycline.

396

### 397 **B-galactosidase assays**

398

399 For the expression of *rsmY-lacZ*, *rsmZ-lacZ*, and *hcnA'-lacZ*, strains were inoculated in TSB from  
400 frozen stock and incubated as previously described with tetracycline when needed. Overnight  
401 cultures were diluted in fresh TSB or M9DCAA modified medium (46) as specified at OD<sub>600</sub>=0.5.

402 The cultures were incubated at 34°C or 37°C in a TC-7 roller drum (New Brunswick) at 110 RPM.

403  $\beta$ -galactosidase activity was measured as previously described (49). Measurements at 420 nm

404 were performed using a Cytation 3 Multiplate Reader (Biotek). Experiments were performed using

405 three biological replicates and were repeated at least twice. Prism 6 (GraphPad) was used for

406 statistics.

## 407 **Complementation experiments**

408

409 The *rsmA* gene was amplified from gDNA of PA14 WT and the evolved C2 clone using primers  
410 For\_Comp\_rsmA\_EcoRI\_FJP and Rev\_Comp\_rsmA\_HindIII (**Table S2**). The amplified fragment  
411 was inserted into pUCP20 using HindIII and EcoRI restriction sites. The obtained clones were  
412 isolated on LB agar with 100 µg/ml carbenicillin. The obtained plasmid was electroporated into  
413 PA14Δ*rsmA rsmY-lacZ* and clones were selected with 250 µg/ml carbenicillin. PA14 *rsmY-lacZ*  
414 with pUCP20 was used as a control.

415

416 Complementation of Δ*hptB* and *rsmA::MrT7* with wild-type *rsmA* was achieved by amplifying the  
417 sequence of *rsmA* from genomic DNA of PA14 using the For\_Comp\_rsmA\_EcoRI\_FJP and  
418 Rev\_Comp\_rsmA\_HindIII primers. The obtained fragment was inserted in the pUCP26 vector by  
419 digestion using EcoRI and HindIII Fast Digest restriction enzymes (Thermo Fisher Scientific). The  
420 plasmid obtained (pFJP18) was transformed in DH5α and selected on LB agar with tetracycline  
421 15 µg/ml. The construct was verified by digestion with EcoRI and HindIII restriction enzymes  
422 (Thermo Fisher Scientific) and PCR. The pFJP18 plasmid was then electroporated into  
423 PA14Δ*hptB* and *rsmA::MrT7* along with empty pUCP26 vector and clones were selected with  
424 tetracycline 125 µg/ml. Four independent clones were tested for their swarming phenotypes.

425

## 426 **Purification of RsmA**

427

428 For purification of RsmA-WT-6xHis and RsmA<sup>R31S</sup>-6xHis, plasmids pET29a(+)-RsmAH6 or  
429 pET29a(+)-RsmA<sup>R31S</sup> were used respectively to produce the protein. Plasmid pET29a-RsmA<sup>R31S</sup>-  
430 H6 was created by inserting a synthesized mutated version of RsmA<sup>R31S</sup> without start and stop  
431 codon into NdeI and XhoI restriction sites (BioBasic) of pET29a(+). Plasmids were transformed in  
432 BL21 (DE3).

433

434 Purification was performed as previously described with slight modifications (34). The BL21(DE3)  
435 strain containing either pET29a(+)-RsmA-H6 or pET29a(+)-RsmA<sup>R31S</sup>-H6 was grown overnight in



436 TSB containing kanamycin 50 µg/ml. Overnight cultures were diluted 1:1000 and grown to  
437 exponential phase in LB containing kanamycin 50 µg/ml at 37°C with shaking at 250 rpm. Cells  
438 were induced by adding IPTG at a final concentration of 1 mM and grown for an additional 4h.  
439 The culture pellet was suspended in a buffer containing 0.5 M NaCl, 20 mM NaH<sub>2</sub>PO<sub>4</sub>, 20 mM  
440 Tris-HCl pH7.5 and 2% imidazole. To purify the protein, a HisTrap HP 5 ml column (GE  
441 Healthcare) was used. Purification was performed using a solution of 0.5 M NaCl, 20 mM  
442 NaH<sub>2</sub>PO<sub>4</sub>, 20 mM Tris-HCl pH 7.5. To elute the His-Tagged protein, a solution of 0.5 M NaCl, 20  
443 mM NaH<sub>2</sub>PO<sub>4</sub>, 20 mM Tris-HCl pH 7.5 and 0.5 M imidazole was applied using a 2-50% gradient  
444 in 100 minutes, completing with up to 100% imidazole solution in 15 minutes using an ÄKTA  
445 FPLC system (GE Healthcare). Fractions containing the protein were pooled and concentrated  
446 using an Amicon with a 3 KDa cut-off (Millipore). The protein was conserved in 10 mM Tris-HCl  
447 pH7.63 and 33% glycerol. A Bradford assay (Bio-Rad) was performed to determine protein  
448 concentration. Confirmation was performed using a Western-Blot with anti-His antibodies (Mouse  
449 antibodies to 6His-peptide) (Meridian Life Science) and Coomassie blue coloration to confirm  
450 protein purity.

451

## 452 **Electrophoretic mobility shift assays of *rsmY* and RsmA/RsmA** 453 **R31S (C2)** 454

455 The *rsmY* small RNA template with a T7 RNA polymerase promoter sequence was produced as  
456 previously described (34). The fragment was amplified using 5'-*rsmY* and 3'-*rsmY* primers (**Table**  
457 **S2**) and a nested PCR was then performed using 3'-*rsmY* nested as the reverse primer.  
458 Purification was done using a FavorPrep™ Gel/ PCR purification kit (Favorgen). The negative  
459 control was the Ykok riboswitch of *Halorhodospira halophila* SL1 (NC\_008789.1). The sequence  
460 is coded at the position 1425650-1425831 on the positive strand of the genome.

461

462 For *in vitro* radioactive transcription, the templates were added to the transcription reaction  
463 containing 0.5 µl of Ribolock RNase inhibitor at 40U/µl (Thermo Fisher Scientific), 1 µl of

464 pyrophosphatase at 5  $\mu$ g/ml (Roche), 4  $\mu$ l of 1 mg/mL T7 RNA polymerase and 20  $\mu$ l of  
465 transcription buffer 5X (Hepes pH7.5 400 mM, MgCl<sub>2</sub> 120 nM, DTT 200 mM and spermidine 10  
466 mM). For nucleotides, 5  $\mu$ l of 100 mM of ATP, GTP and CTP were added. For UTP, 1  $\mu$ l of 2 mM  
467 of non-radiolabelled and 5  $\mu$ Ci [ $\alpha$ <sup>32</sup>P]-UTP was added to the mix. The final volume was 100  $\mu$ l per  
468 reaction. The reaction was 3h at 37°C. A DNase I RNase free 2000 U/ml (NEB) treatment was  
469 done using 1  $\mu$ l for 15 minutes at 37°C. The resulting RNA was purified on an 8% 19:1  
470 acrylamide:bisacrylamide 8M urea denaturing PAGE and resuspended in 250  $\mu$ l of RNase-free  
471 water.

472

473 For the EMSA assay, various concentrations of each protein were mixed to 2  $\mu$ l of radio-labelled  
474 RNA in a reaction described in Jean-Pierre *et al.* (34) containing 20 mg of non-specific t-RNA  
475 competitor, 10 mM Tris-HCl pH7.5, 10 mM MgCl<sub>2</sub>, 50 mM NaCl, 50 mM KCl, 5 mM DTT. Negative  
476 control was done in the same condition containing no protein but containing glycerol and Tris-HCl  
477 10 mM pH7.5 (the protein dilution buffer). The reaction was incubated 30 minutes at 37°C. The  
478 mixture was added mixed to 6X loading buffer containing (40% sucrose, 0.05% xylene cyanol,  
479 0.05% bromophenol blue) and loaded on an 8% (29:1) native polyacrylamide native gel using  
480 Tris-Borate EDTA (TBE) as the running buffer. The gel was run at room temperature for 6h at  
481 150V. The gel was scanned using a Typhoon PhosphorImager FLA9500 (GE Healthcare) and  
482 ImageQuant software was used for analysis of the image. The gel was repeated twice with similar  
483 result.

484

## 485 **Molecular modeling of the WT and R31S RsmA-RsmY complexes**

486

487 To investigate atomic-scale contributions of the R31S mutation in RsmA, structural alignments  
488 were first performed between apo and holo forms of RsmA, RsmE, and RsmN homologs using  
489 PDB entries 1VPZ, 4KJI, 2MF0, and 2JPP in UCSF Chimera 1.14 (50). Since regulators bind  
490 their respective RNA ligands through a conserved hairpin RNA motif, the RsmY ligand was  
491 modeled from the experimental structure of the RsmZ analog bound to RsmN (PDB 4KJI). RNA

492 sequence alignment was performed using the Needleman-Wunsch algorithm in package  
493 BioLabDonkey 1.9-17. We first identified RsmY/Z hairpin motif sequence identity, followed by  
494 mutational transposition of RsmY nucleotides in the RsmZ structural template. Once the  
495 molecular sRNA hairpin motif was created, the RsmA<sup>R31S</sup> mutant was built in a similar fashion by  
496 replacing Arg31 with Ser31. A physiological pH value of 7.4 was applied to assign protonation  
497 states of charged amino acids, with pKa values predicted according to parameters reported by  
498 (51). Rotameric positions and RsmA-RsmY refinement for WT and R31S complexes was  
499 optimized by performing molecular dynamics simulations (500 ps, 298K) under explicit solvent  
500 conditions with a water density of 0.997 g/ml and pressure density stabilized by the  
501 Manometer1D tool. This protocol enables a rescaling factor to be applied over the entire MD cell  
502 (cuboid shape) to maintain constant pressure during simulations. The unit cell was extended 10 Å  
503 with solute on each side of the system, and ion concentration was set as a mass fraction of 0.9%  
504 NaCl to emulate physiological conditions. The simulation time step ran at 2x1.25 fs in periodic  
505 boundary conditions using particle-mesh Ewald (PME) and 8.0 Å cutoff for non-bonded real  
506 space forces. The CorrectDrift algorithm was applied to prevent solute molecules from diffusing  
507 around and crossing periodic boundaries. A final energy minimization step was performed after  
508 refinement of the RNA-protein complexes. Building of the RsmY RNA hairpin motif, structural  
509 refinement, molecular dynamics simulations (MD), and energy minimization steps for all  
510 molecular systems were performed using YASARA-Structure 19.12.14 (52). The YASARA2 force  
511 field was applied for refinement, solvation, and MD simulations of RsmA-RsmY complexes (53).  
512 RNA-protein interface analysis of all complexes was also performed using the MolDock scoring  
513 function provided by the Molegro Virtual Docker suite, version 6.0 (54).

514

### 515 **Stability and energy contributions of the R31S mutation in RsmA**

516 The structural and energetic effects caused by the R31S mutation were assessed by evaluating  
517 unfavorable torsion angles and investigating the local structural environment of the mutated  
518 position using CUPSAT (55). We also used DUET to perform mutational analysis based on  
519 energy function calculations (56). Analysis and prediction of protein stability changes upon

520 mutation was also performed by Normal Mode Analysis using DynaMut (57). Finally, Mupro was  
521 used to calculate neural networks that compute the effects of mutation from sequence and  
522 structure predictions (58).

523

524

## 525 **Figures**

526 **Figure 1. Swarming phenotype of the C2 and C4 clones is similar to wild-type**

527 ***Pseudomonas aeruginosa* PA14.** Swarming motility of (A) PA14 and  $\Delta hptB$  (B)  $\Delta gacA$ ,

528  $\Delta hptBgacA$ , and clone C4, (C)  $\Delta rsmA$ ,  $\Delta hptBrsmA$ , clone C2 after 20h of incubation at 34°C.

529

530 **Figure 2. Analysis of *rsmY* and *rsmZ* expression in the C4 clone mutant.** (A)  $\beta$ -galactosidase

531 activity of a *rsmY-lacZ* reporter (B) and *rsmZ-lacZ* reporter in bacteria grown in TSB at 37°C after

532 5h of incubation. One-way ANOVA was performed comparing each strain to each other ( $*\leq 0.05$ ,

533  $**\leq 0.01$ ,  $***\leq 0.001$ ,  $****\leq 0.0001$ ). See **Fig. S1** for the growth of each strain.

534

535 **Figure 3. Complementation of mutant *rsmA* with pUCP20 as a control, pSR15 (pUCP20-**

536 ***rsmA*) and pSR16 (pUCP20-*rsmA*<sup>R31S</sup>) for the *rsmY-lacZ* expression at 6h in TSB at 37°C.**

537 One-way ANOVA was performed to compare each strain to each other. ( $*\leq 0.05$ ,  $**\leq 0.01$ ,

538  $***\leq 0.001$ ,  $****\leq 0.0001$ ). See **Fig. S3** for the growth of each strain.

539 **Figure 4. Expression of RmsA-regulated targets in the C2 clone mutant.** (A)  $\beta$ -galactosidase

540 activity of *hcnA-lacZ*, (B) *rsmY-lacZ* (C) and *rsmZ-lacZ* at 34°C in M9DCAA at 8h for *hcnA-lacZ*

541 and 6h for *rsmY-lacZ* and *rsmZ-lacZ*. One-way ANOVA was performed to compare each strain to

542 each other. ( $*\leq 0.05$ ,  $**\leq 0.01$ ,  $***\leq 0.001$ ,  $****\leq 0.0001$ ). See **Fig S4** for the growth of each strain.

543 **Figure 5. Prediction of RsmA<sup>R31S</sup> interaction with sRNA RsmY.** Structural effects induced by

544 the R31S mutation in post-transcriptional regulator RsmA upon binding to its sRNA repressor

545 RsmY. (A) Structural comparison between RsmA from *P. aeruginosa* (blue, left and middle panel)

546 and three homologous regulators (middle panel): RsmN from *P. aeruginosa* (gray, PDB 4KJI),

547 RsmE from *P. protegens* (red, PDB 2MF0), and RsmE from *P. fluorescens* (green, PDB 2JPP).

548 Overlay illustrates structural conservation of post-transcriptional regulators throughout the

549 *Pseudomonas* genus. Regulator protein homologs also bind RNA targets in a similar fashion,  
550 involving the conservation of a structural RNA hairpin motif (gold surface), which triggers  
551 repositioning of the conserved R31 side chain (R49 in RsmN) upon RNA binding (right panel).  
552 This further emphasizes the role played by the wild-type R31 in stabilization of the U<sub>88</sub>A<sub>89</sub>  
553 nucleotide pair located downstream of the conserved GGA motif in RsmY. (B) Structural model of  
554 the RsmA-RsmY complex built using the highly homologous RsmN-RsmZ pair as cognate  
555 template (gray, PDB 4KJI). *In silico* point mutations (middle panel, nucleotides marked with a  
556 star) were introduced to convert the RsmZ hairpin sequence motif into the corresponding putative  
557 RsmY hairpin analog bound to RsmA. The right panel shows how the R31S mutation destabilizes  
558 the RsmA-RsmY binding complex by abrogating two putative hydrogen bonding interactions  
559 (green dashed lines) between the terminal wild-type R31 guanidinium moiety and the U<sub>88</sub>A<sub>89</sub>  
560 nucleotide pair downstream of the conserved GGA motif in cognate RsmY repressor.

561

562 **Figure 6. *In vitro* interaction of RsmA and RsmA<sup>R31S</sup> with RsmY.** EMSA of *rsmY* small RNA  
563 by wild-type RsmA (WT) and mutated RsmA<sup>R31S</sup> with 0 to 0.5 μM of each protein. Sections A, B,  
564 C represent the delimitation of the boxes used to measure radioactivity for **Fig S6**. Complexes  
565 are identified by numbers 1-2-3 and arrows on the EMSA.

566

567

## 568 **Acknowledgments**

569 We thank Charles Morin for construction for the *ΔgacA* and *ΔhptBgacA* mutants and for helpful  
570 discussions and Sabine Najeh for providing labelled YkoK riboswitch control. We also gratefully  
571 acknowledge the technical support provided by Myriam Létourneau and Émilie Boutet for the  
572 RsmA purification and EMSA assays, respectively. SR obtained PhD scholarship from the Fonds  
573 de recherche du Québec – Nature et technologies (FRQNT) and also from the Fondation  
574 Armand-Frappier de l'INRS.

575

## 576 References

- 577 1. Ann M. Stock, Victoria L. Robinson a, Goudreau PN. Two-Component Signal  
578 Transduction. Annual Review of Biochemistry. 2000;69(1):183-215.
- 579 2. Beier D, Gross R. Regulation of bacterial virulence by two-component systems. Current  
580 Opinion in Microbiology. 2006;9(2):143-52.
- 581 3. Hoch JA, Varughese KI. Keeping Signals Straight in Phosphorelay Signal Transduction. J  
582 Bacteriol. 2001;183(17):4941.
- 583 4. Zhang W, Shi L. Distribution and evolution of multiple-step phosphorelay in prokaryotes:  
584 lateral domain recruitment involved in the formation of hybrid-type histidine kinases. Microbiology.  
585 2005;151(7):2159-73.
- 586 5. Van Delden C, Iglewski BH. Cell-to-cell signaling and *Pseudomonas aeruginosa*  
587 infections. Emerging Infectious Diseases. 1998;4(4):551-60.
- 588 6. Spicuzza L, Sciuto C, Vitaliti G, Di Dio G, Leonardi S, La Rosa M. Emerging pathogens in  
589 cystic fibrosis: ten years of follow-up in a cohort of patients. European Journal of Clinical  
590 Microbiology & Infectious Diseases. 2009;28(2):191-5.
- 591 7. Rodrigue A, Quentin Y, Lazdunski A, Méjean V, Foglino M. Cell signalling by  
592 oligosaccharides. Two-component systems in *Pseudomonas aeruginosa*: why so many? Trends  
593 in Microbiology. 2000;8(11):498-504.
- 594 8. Brennic A, Lory S. Determination of the regulon and identification of novel mRNA targets  
595 of *Pseudomonas aeruginosa* RsmA. Molecular Microbiology. 2009;72(3):612-32.
- 596 9. Goodman AL, Kulasekara B, Rietsch A, Boyd D, Smith RS, Lory S. A signaling network  
597 reciprocally regulates genes associated with acute infection and chronic persistence in  
598 *Pseudomonas aeruginosa*. Dev Cell. 2004;7.
- 599 10. Brennic A, McFarland KA, McManus HR, Castang S, Mogno I, Dove SL, et al. The  
600 GacS/GacA signal transduction system of *Pseudomonas aeruginosa* acts exclusively through its  
601 control over the transcription of the RsmY and RsmZ regulatory small RNAs. Mol Microbiol.  
602 2009;73(3):434-45.
- 603 11. Hrabak EM, Willis DK. The lemA gene required for pathogenicity of *Pseudomonas*  
604 *syringae* pv. *syringae* on bean is a member of a family of two-component regulators. J Bacteriol.  
605 1992;174(9):3011-20.
- 606 12. Laville J, Voisard C, Keel C, Maurhofer M, Défago G, Haas D. Global control in  
607 *Pseudomonas fluorescens* mediating antibiotic synthesis and suppression of black root rot of  
608 tobacco. Proceedings of the National Academy of Sciences. 1992;89(5):1562-6.
- 609 13. Jean-Pierre F, Tremblay J, Déziel E. Broth versus Surface-Grown Cells: Differential  
610 Regulation of RsmY/Z Small RNAs in *Pseudomonas aeruginosa* by the Gac/HptB System.  
611 Frontiers in Microbiology. 2017;7(2168).
- 612 14. Heeb S, Blumer C, Haas D. Regulatory RNA as mediator in GacA/RsmA-dependent  
613 global control of exoproduct formation in *Pseudomonas fluorescens* CHA0. J Bacteriol.  
614 2002;184(4):1046-56.
- 615 15. Valverde C, Heeb S, Keel C, Haas D. RsmY, a small regulatory RNA, is required in  
616 concert with RsmZ for GacA-dependent expression of biocontrol traits in *Pseudomonas*  
617 *fluorescens* CHA0. Molecular microbiology. 2003;50:1361-79.
- 618 16. Burrowes E, Abbas A, O'Neill A, Adams C, O'Gara F. Characterisation of the regulatory  
619 RNA RsmB from *Pseudomonas aeruginosa* PAO1. Res Microbiol. 2005;156(1):7-16.
- 620 17. Liu MY, Gui G, Wei B, Preston JF, Oakford L, Yüksel Ü, et al. The RNA Molecule CsrB  
621 Binds to the Global Regulatory Protein CsrA and Antagonizes Its Activity in *Escherichia coli*.  
622 Journal of Biological Chemistry. 1997;272(28):17502-10.
- 623 18. Mulcahy H, O'Callaghan J, O'Grady EP, Maciá MD, Borrell N, Gómez C, et al.  
624 *Pseudomonas aeruginosa* RsmA plays an important role during murine infection by influencing  
625 colonization, virulence, persistence, and pulmonary inflammation. Infection and immunity.  
626 2008;76(2):632-8.
- 627 19. Kearns DB. A field guide to bacterial swarming motility. Nat Rev Microbiol. 2010;8(9):634-  
628 44.

- 629 20. Heurlier K, Williams F, Heeb S, Dormond C, Pessi G, Singer D, et al. Positive control of  
630 swarming, rhamnolipid synthesis, and lipase production by the posttranscriptional RsmA/RsmZ  
631 system in *Pseudomonas aeruginosa* PAO1. *J Bacteriol.* 2004;186(10):2936-45.
- 632 21. Hsu JL, Chen HC, Peng HL, Chang HY. Characterization of the histidine-containing  
633 phosphotransfer protein B-mediated multistep phosphorelay system in *Pseudomonas aeruginosa*  
634 PAO1. *J Biol Chem.* 2008;283(15):9933-44.
- 635 22. Boyle KE, Monaco HT, Deforet M, Yan J, Wang Z, Rhee K, et al. Metabolism and the  
636 Evolution of Social Behavior. *Molecular Biology and Evolution.* 2017;34(9):2367-79.
- 637 23. Robitaille S, Groleau M-C, Déziel E. Swarming Motility Growth Favors the Emergence of  
638 a Subpopulation of *Pseudomonas aeruginosa* Quorum Sensing Mutants. *Environmental*  
639 *Microbiology.* 2020(Accepted Author Manuscript).
- 640 24. Heurlier K, Williams F, Heeb S, Dormond C, Pessi G, Singer D, et al. Positive Control of  
641 Swarming, Rhamnolipid Synthesis, and Lipase Production by the Posttranscriptional RsmA/RsmZ  
642 System in *Pseudomonas aeruginosa* PAO1. *J Bacteriol.* 2004;186(10):2936-45.
- 643 25. Pessi G, Williams F, Hindle Z, Heurlier K, Holden MTG, Cámara M, et al. The Global  
644 Posttranscriptional Regulator RsmA Modulates Production of Virulence Determinants and N-  
645 Acylhomoserine Lactones in *Pseudomonas aeruginosa*. *J Bacteriol.* 2001;183(22):6676-83.
- 646 26. Lapouge K, Sineva E, Lindell M, Starke K, Baker CS, Babitzke P, et al. Mechanism of  
647 hcnA mRNA recognition in the Gac/Rsm signal transduction pathway of *Pseudomonas*  
648 *fluorescens*. *Molecular Microbiology.* 2007;66(2):341-56.
- 649 27. Barik A, Nithin C, Karampudi NB, Mukherjee S, Bahadur RP. Probing binding hot spots at  
650 protein-RNA recognition sites. *Nucleic Acids Res.* 2016;44(2):e9.
- 651 28. Krüger DM, Neubacher S, Grossmann TN. Protein-RNA interactions: structural  
652 characteristics and hotspot amino acids. *Rna.* 2018;24(11):1457-65.
- 653 29. Janssen KH, Diaz MR, Golden M, Graham JW, Sanders W, Wolfgang MC, et al.  
654 Functional Analyses of the RsmY and RsmZ Small Noncoding Regulatory RNAs in *Pseudomonas*  
655 *aeruginosa*. *J Bacteriol.* 2018;200(11):e00736-17.
- 656 30. Marden JN, Diaz MR, Walton WG, Gode CJ, Betts L, Urbanowski ML, et al. An unusual  
657 CsrA family member operates in series with RsmA to amplify posttranscriptional responses in  
658 *Pseudomonas aeruginosa*. *Proceedings of the National Academy of Sciences.*  
659 2013;110(37):15055-60.
- 660 31. Caiazza NC, Shanks RM, O'Toole GA. Rhamnolipids modulate swarming motility  
661 patterns of *Pseudomonas aeruginosa*. *J Bacteriol.* 2005;187(21):7351-61.
- 662 32. Shrouf JD, Chopp DL, Just CL, Hentzer M, Givskov M, Parsek MR. The impact of  
663 quorum sensing and swarming motility on *Pseudomonas aeruginosa* biofilm formation is  
664 nutritionally conditional. *Molecular Microbiology.* 2006;62(5):1264-77.
- 665 33. Lai S, Tremblay J, Déziel E. Swarming motility: a multicellular behaviour conferring  
666 antimicrobial resistance. *Environ Microbiol.* 2009;11(1):126-36.
- 667 34. Jean-Pierre F, Perreault J, Déziel E. Complex autoregulation of the post-transcriptional  
668 regulator RsmA in *Pseudomonas aeruginosa*. *Microbiology.* 2015;161(9):1889-96.
- 669 35. Duffy BK, Défago G. Controlling instability in gacS-gacA regulatory genes during  
670 inoculant production of *Pseudomonas fluorescens* biocontrol strains. *Applied and environmental*  
671 *microbiology.* 2000;66(8):3142-50.
- 672 36. Song C, Kidarsa TA, van de Mortel JE, Loper JE, Raaijmakers JM. Living on the edge:  
673 emergence of spontaneous gac mutations in *Pseudomonas protegens* during swarming motility.  
674 *Environmental Microbiology.* 2016;18(10):3453-65.
- 675 37. Yan Q, Lopes LD, Shaffer BT, Kidarsa TA, Vining O, Philmus B, et al. Secondary  
676 Metabolism and Interspecific Competition Affect Accumulation of Spontaneous Mutants in the  
677 GacS-GacA Regulatory System in *Pseudomonas protegens*. *mBio.* 2018;9(1):e01845-17.
- 678 38. Reimann C, Beyeler M, Latifi A, Winteler H, Foglino M, Lazdunski A, et al. The global  
679 activator GacA of *Pseudomonas aeruginosa* PAO positively controls the production of the  
680 autoinducer N - butyryl - homoserine lactone and the formation of the virulence factors  
681 pyocyanin, cyanide, and lipase. *Molecular Microbiology.* 1997;24(2):309-19.
- 682 39. Heeb S, Haas D. Regulatory roles of the GacS/GacA two-component system in plant-  
683 associated and other gram-negative bacteria. *Mol Plant Microbe Interact.* 2001;14(12):1351-63.



- 684 40. Mercante J, Suzuki K, Cheng X, Babitzke P, Romeo T. Comprehensive Alanine-scanning  
685 Mutagenesis of Escherichia coli CsrA Defines Two Subdomains of Critical Functional Importance.  
686 Journal of Biological Chemistry. 2006;281(42):31832-42.
- 687 41. Heeb S, Kuehne SA, Bycroft M, Crivii S, Allen MD, Haas D, et al. Functional Analysis of  
688 the Post-transcriptional Regulator RsmA Reveals a Novel RNA-binding Site. J Mol Biol.  
689 2006;355(5):1026-36.
- 690 42. Gebhardt MJ, Kambara TK, Ramsey KM, Dove SL. Widespread targeting of nascent  
691 transcripts by RsmA in *Pseudomonas aeruginosa*. Proceedings of the National Academy of  
692 Sciences. 2020.
- 693 43. Boyle KE, Heilmann S, van Ditmarsch D, Xavier JB. Exploiting social evolution in  
694 biofilms. Curr Opin Microbiol. 2013.
- 695 44. van Ditmarsch D, Boyle Kerry E, Sakhtah H, Oyler Jennifer E, Nadell Carey D, Déziel É,  
696 et al. Convergent Evolution of Hyperswarming Leads to Impaired Biofilm Formation in Pathogenic  
697 Bacteria. Cell Reports. 2013;4(4):697-708.
- 698 45. Rahme LG, Stevens EJ, Wolfort SF, Shao J, Tompkins RG, Ausubel FM. Common  
699 virulence factors for bacterial pathogenicity in plants and animals. Science. 1995;268(5219):1899.
- 700 46. Tremblay J, Déziel E. Improving the reproducibility of *Pseudomonas aeruginosa*  
701 swarming motility assays. J Basic Microbiol. 2008;48(6):509-15.
- 702 47. Hmelo LR, Borlee BR, Almblad H, Love ME, Randall TE, Tseng BS, et al. Precision-  
703 engineering the *Pseudomonas aeruginosa* genome with two-step allelic exchange. Nat Protocols.  
704 2015;10(11):1820-41.
- 705 48. Choi K-H, Kumar A, Schweizer HP. A 10-min method for preparation of highly  
706 electrocompetent *Pseudomonas aeruginosa* cells: Application for DNA fragment transfer between  
707 chromosomes and plasmid transformation. Journal of Microbiological Methods. 2006;64(3):391-7.
- 708 49. Miller J, Lee K. Experiments in molecular genetics. Yi Hsien Pub. Co.; 1984.
- 709 50. Pettersen EF, Goddard TD, Huang CC, Couch GS, Greenblatt DM, Meng EC, et al.  
710 UCSF Chimera—A visualization system for exploratory research and analysis. J Comput Chem.  
711 2004;25(13):1605-12.
- 712 51. Krieger E, Nielsen JE, Spronk CAEM, Vriend G. Fast empirical pKa prediction by Ewald  
713 summation. Journal of Molecular Graphics and Modelling. 2006;25(4):481-6.
- 714 52. Krieger E, Vriend G. New ways to boost molecular dynamics simulations. J Comput  
715 Chem. 2015;36(13):996-1007.
- 716 53. Krieger E, Joo K, Lee J, Lee J, Raman S, Thompson J, et al. Improving physical realism,  
717 stereochemistry, and side-chain accuracy in homology modeling: Four approaches that  
718 performed well in CASP8. Proteins: Structure, Function, and Bioinformatics. 2009;77(S9):114-22.
- 719 54. Thomsen R, Christensen MH. MolDock: A New Technique for High-Accuracy Molecular  
720 Docking. Journal of Medicinal Chemistry. 2006;49(11):3315-21.
- 721 55. Parthiban V, Gromiha MM, Schomburg D. CUPSAT: prediction of protein stability upon  
722 point mutations. Nucleic acids research. 2006;34(Web Server issue):W239-W42.
- 723 56. Pires DEV, Ascher DB, Blundell TL. DUET: a server for predicting effects of mutations on  
724 protein stability using an integrated computational approach. Nucleic acids research.  
725 2014;42(Web Server issue):W314-W9.
- 726 57. Rodrigues CH, Pires DE, Ascher DB. DynaMut: predicting the impact of mutations on  
727 protein conformation, flexibility and stability. Nucleic acids research. 2018;46(W1):W350-W5.
- 728 58. Cheng J, Randall A, Baldi P. Prediction of protein stability changes for single-site  
729 mutations using support vector machines. Proteins: Structure, Function, and Bioinformatics.  
730 2006;62(4):1125-32.
- 731

732

## 733 **Supplemental Information** 734 **Supplemental Figures**

735 **Figure S1. Growth of the C4 clones and related strains.** The growth of (A) evolved clone C4  
736 containing a *rsmY-lacZ* reporter and associated strains, (B) evolved clone C4 and associated  
737 strain containing *rsmZ-lacZ*, in TSB at 37° C at 5h of incubation. One-way ANOVA was used to  
738 compare each strain to each other. Prism 6 (GraphPad) was used for statistics (\* $\leq$ 0.05, \*\* $\leq$ 0.01,  
739 \*\*\* $\leq$ 0.001, \*\*\*\* $\leq$ 0.0001).

740 **Fig S2. Swarming of  $\Delta hptB$  mutant when complemented with a plasmid-borne *rsmA*.**  
741 Swarming motility of  $\Delta hptB$  and *rsmA*<sup>-</sup> with pUCP26 or pFJP18 (pUCP26-RsmA) on M9CAA with  
742 added tetracycline.

743 **Figure S3. Growth of the complementation strains.** Growth of the strains for the  
744 complementation of RsmA in TSB at 37°C at 6h. One-way ANOVA was used to compare each  
745 strain with each other strains (\* $\leq$ 0.05, \*\* $\leq$ 0.01, \*\*\* $\leq$ 0.001, \*\*\*\* $\leq$ 0.0001).

746 **Figure S4. Growth of the C2 clones and related strains.** Growth of the strains with the (A)  
747 *hcnA-lacZ* reporter (B) *rsmY-lacZ* and (C) *rsmZ-lacZ* in M9DCAA medium at 34°C 8h for *hcnA-*  
748 *lacZ* and 6h for *rsmZ-lacZ* and *rsmY-lacZ*. One-way ANOVA was used to compare each strain  
749 with each other strains (\* $\leq$ 0.05, \*\* $\leq$ 0.01, \*\*\* $\leq$ 0.001, \*\*\*\* $\leq$ 0.0001).

750 **Figure S5. Binding of RsmA and RsmA<sup>R31S</sup> to negative control.** EMSA YkoK riboswitch RNA  
751 by wild-type RsmA (WT) and mutated RsmA<sup>R31S</sup> with 0 to 0.5  $\mu$ M of each protein. The YkoK  
752 riboswitch from *Halorhodospira halophila* SL1 was used as a negative control. This RNA is not  
753 known to be regulated by RsmA. Although, the negative control shifts at high protein  
754 concentrations, the RsmY shift was achieved at 100 times lower protein concentrations than  
755 YkoK riboswitch. There is a GGA in the sequence of the riboswitch that could explain the slight  
756 shift.

757 **Figure S6. Quantification of the binding between RsmY and RsmA<sup>R31S</sup>** . Graphic  
758 representation of the binding of RsmA and RsmA<sup>R31S</sup> to RsmY(A) when forming Complex 3, (B)  
759 when forming Complex 1 and 2, and (C) when unbound. The ratio of intensity of each section is  
760 represented on total intensity for each concentration. See **Fig. 6** for each complex and section  
761 where radioactivity is measured (**Fig. 6A-B-C**). The intensities shown are the mean of the results  
762 from two independent gels having similar results and error bars are the standard deviation

763 **Figure S7. Comparison of CsrA sequences from *P. aeruginosa* strains and other species.**  
764 CsrA protein sequences were obtained through BLAST (NCBI) of the RsmA sequence from PA14  
765 (highlight in yellow), and by modify the R31 residue. CsrA from *P. aeruginosa* with 100% identity  
766 and modified versions at R31 residue were aligned with other species CsrA with a modified R31  
767 residue using Clustal Omega 1.2.3.

768

## 769 **Supplementary Tables**

770

771 **S1 Table. Strains used in this study**

772 **S2 Table. Primers used in this study**

**A****PA14** **$\Delta hptB$** 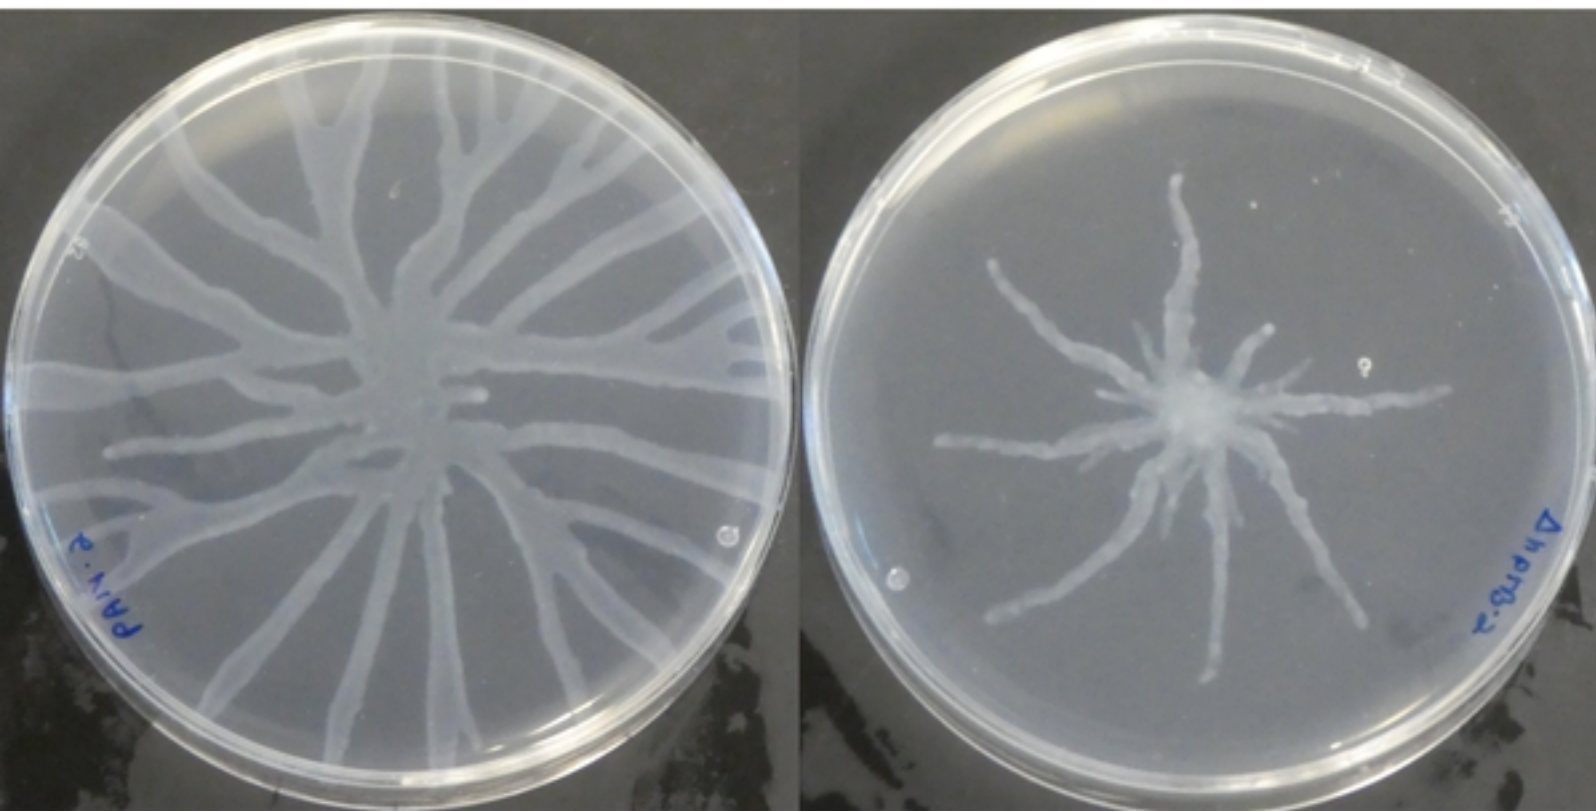**B**

bioRxiv preprint doi: <https://doi.org/10.1101/2020.07.15.203992>; this version posted July 15, 2020. The copyright holder for this preprint (which was not certified by peer review) is the author/funder, who has granted bioRxiv a license to display the preprint in perpetuity. It is made available under aCC-BY 4.0 International license.

 **$\Delta gacA$**  **$\Delta hptB gacA$** **C4**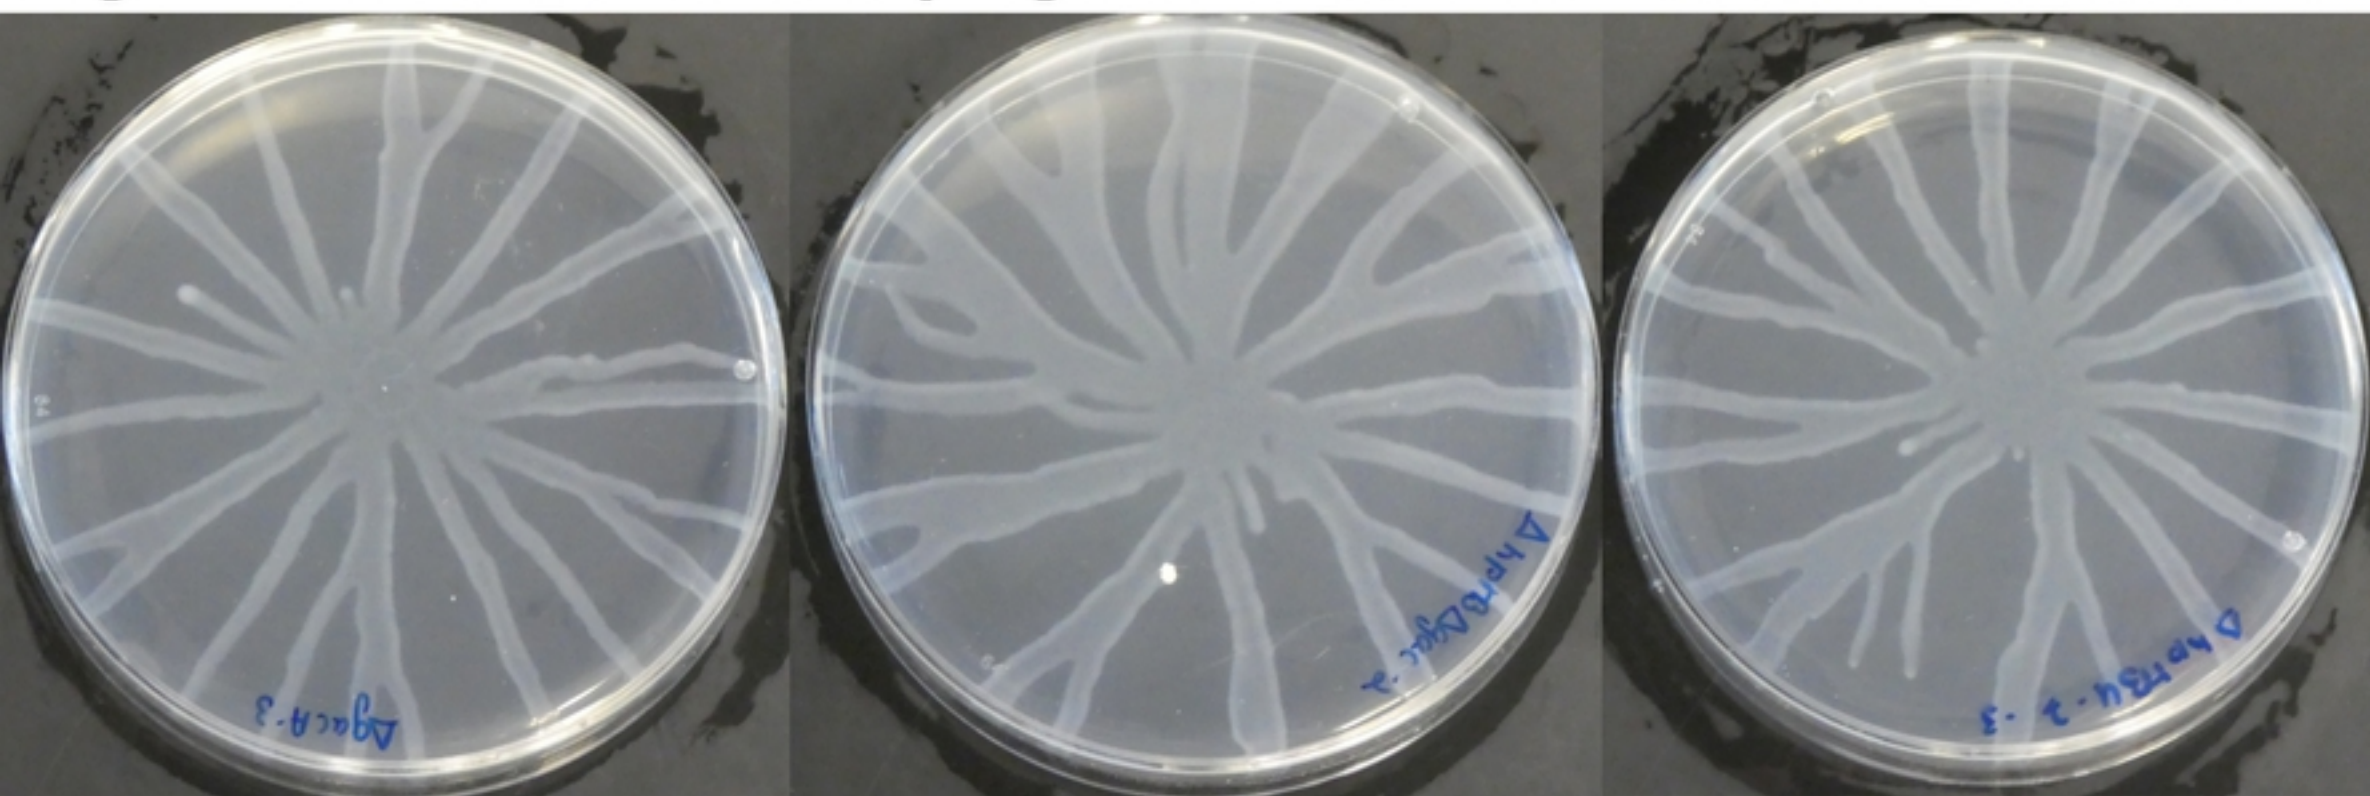**C** **$\Delta rsmA$**  **$\Delta hptB rsmA$** **C2**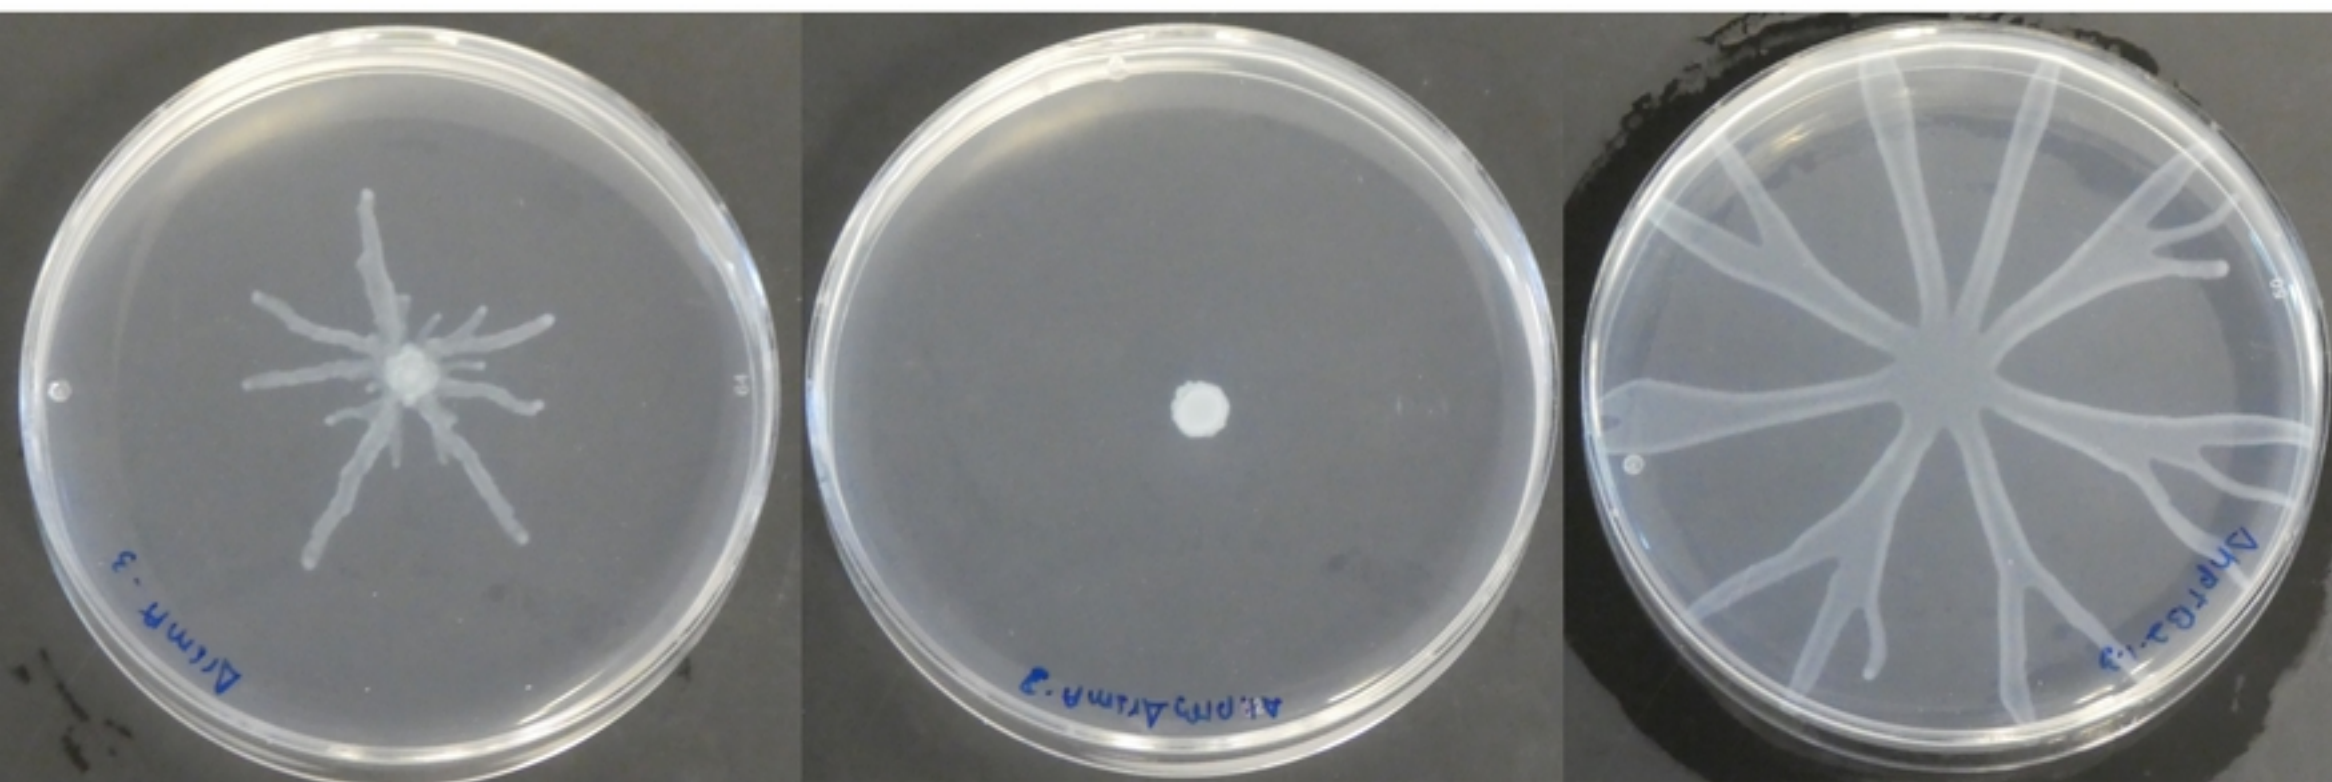

Figure 1

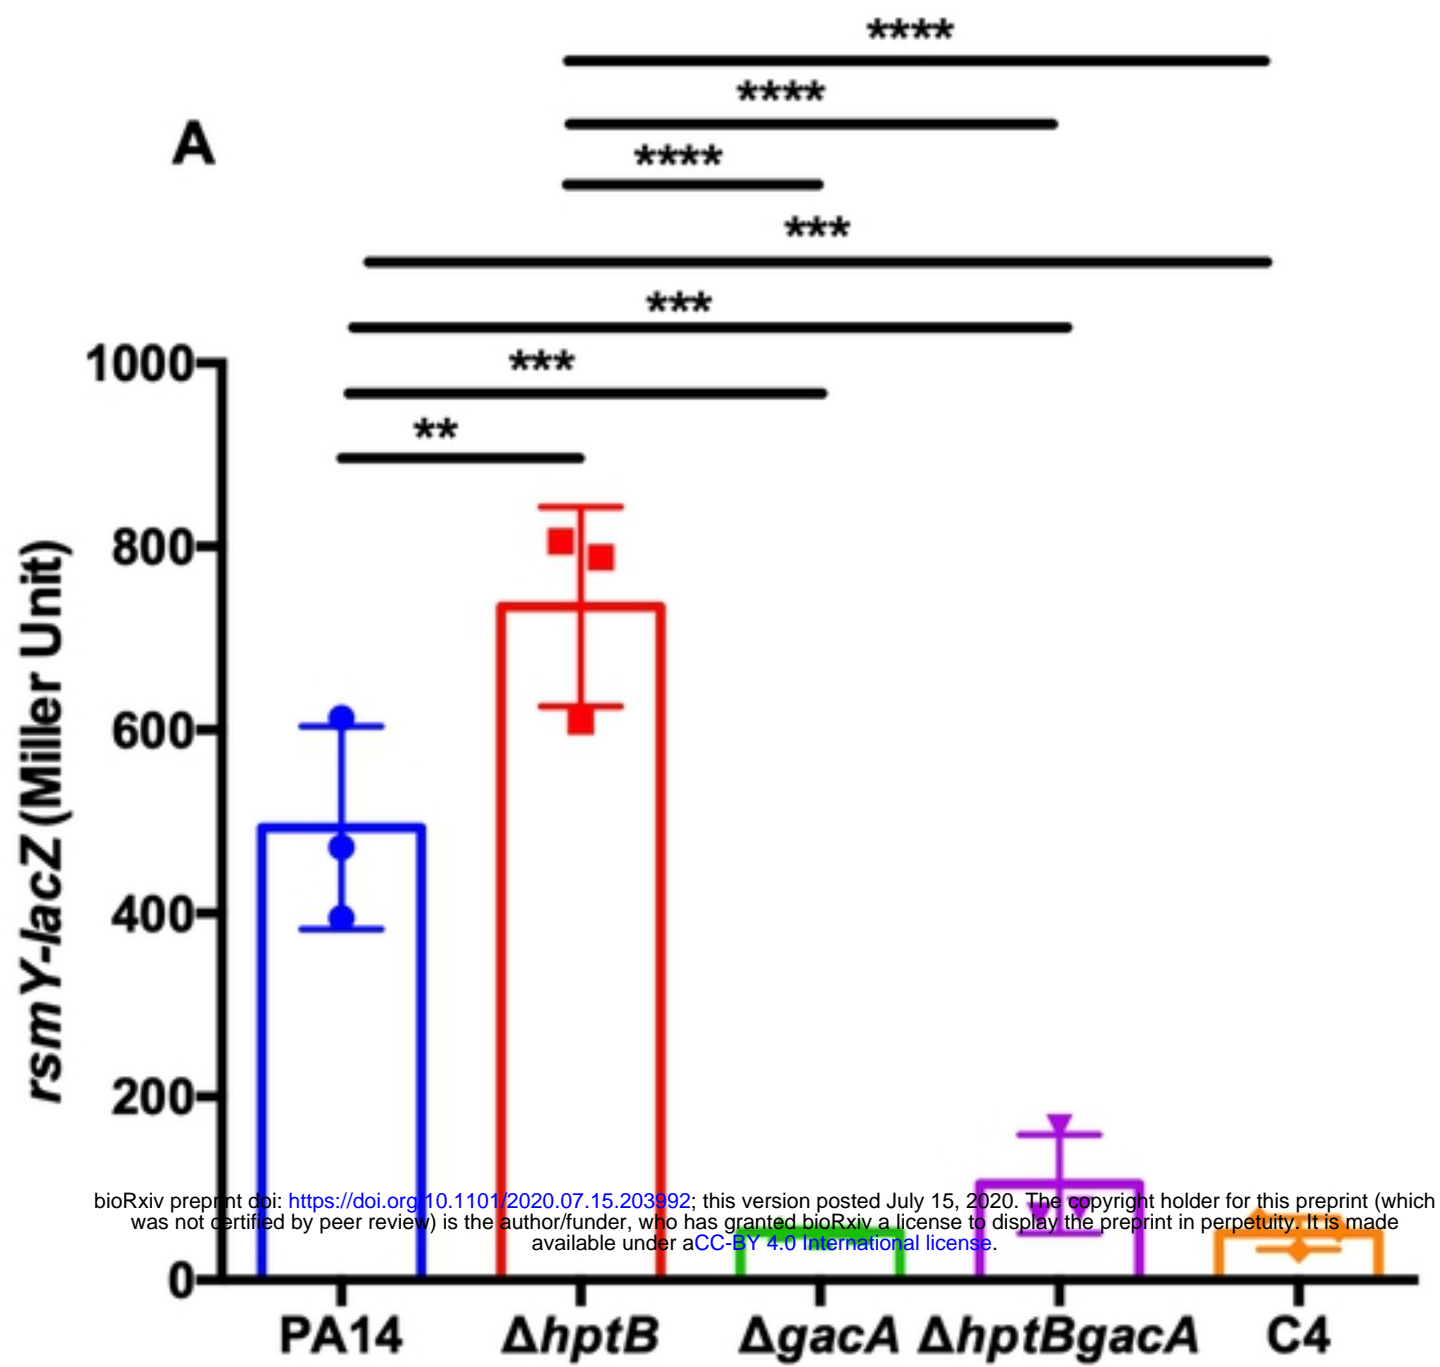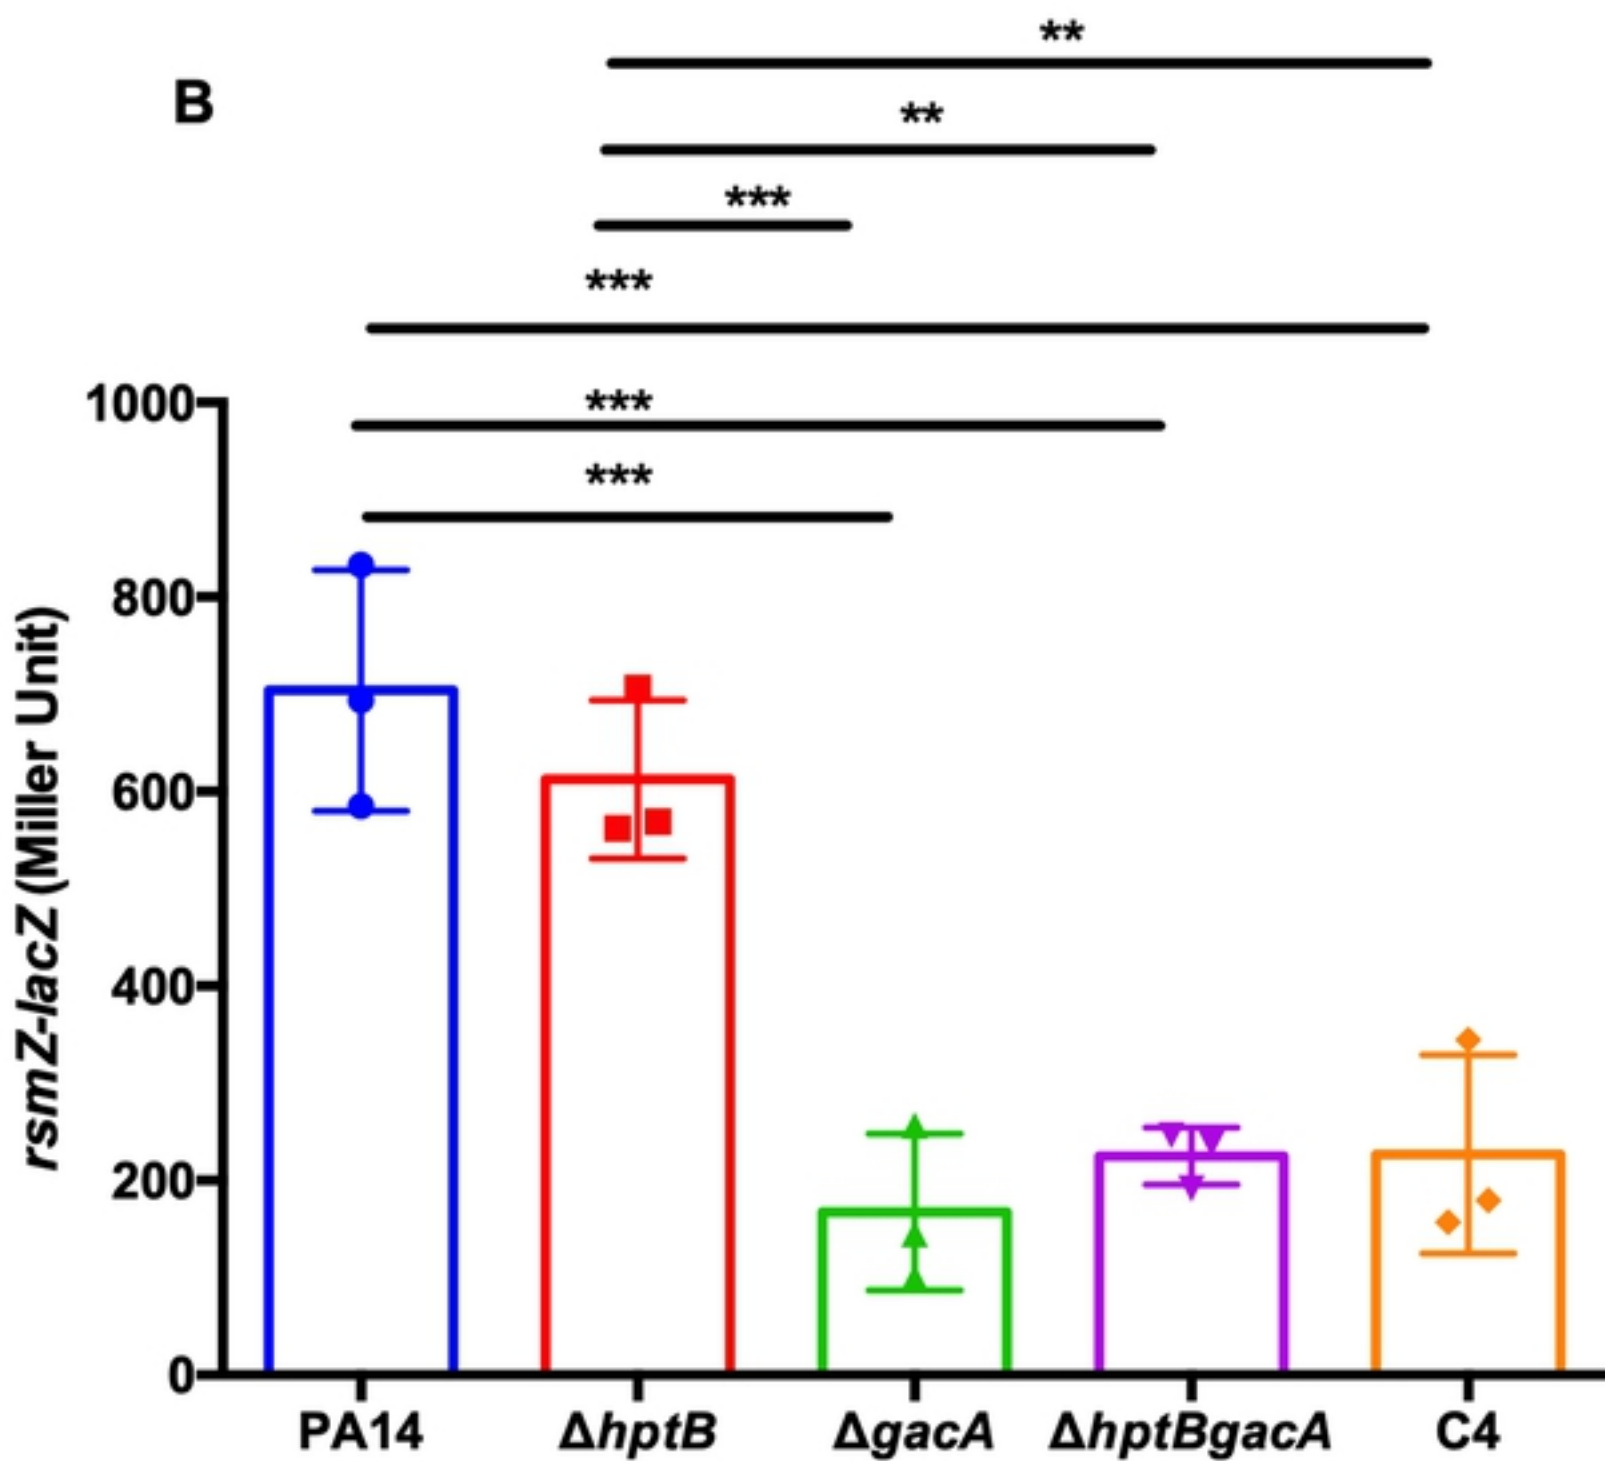

Figure 2

bioRxiv preprint doi: <https://doi.org/10.1101/2020.07.15.203992>; this version posted July 15, 2020. The copyright holder for this preprint (which was not certified by peer review) is the author/funder, who has granted bioRxiv a license to display the preprint in perpetuity. It is made available under aCC-BY 4.0 International license.

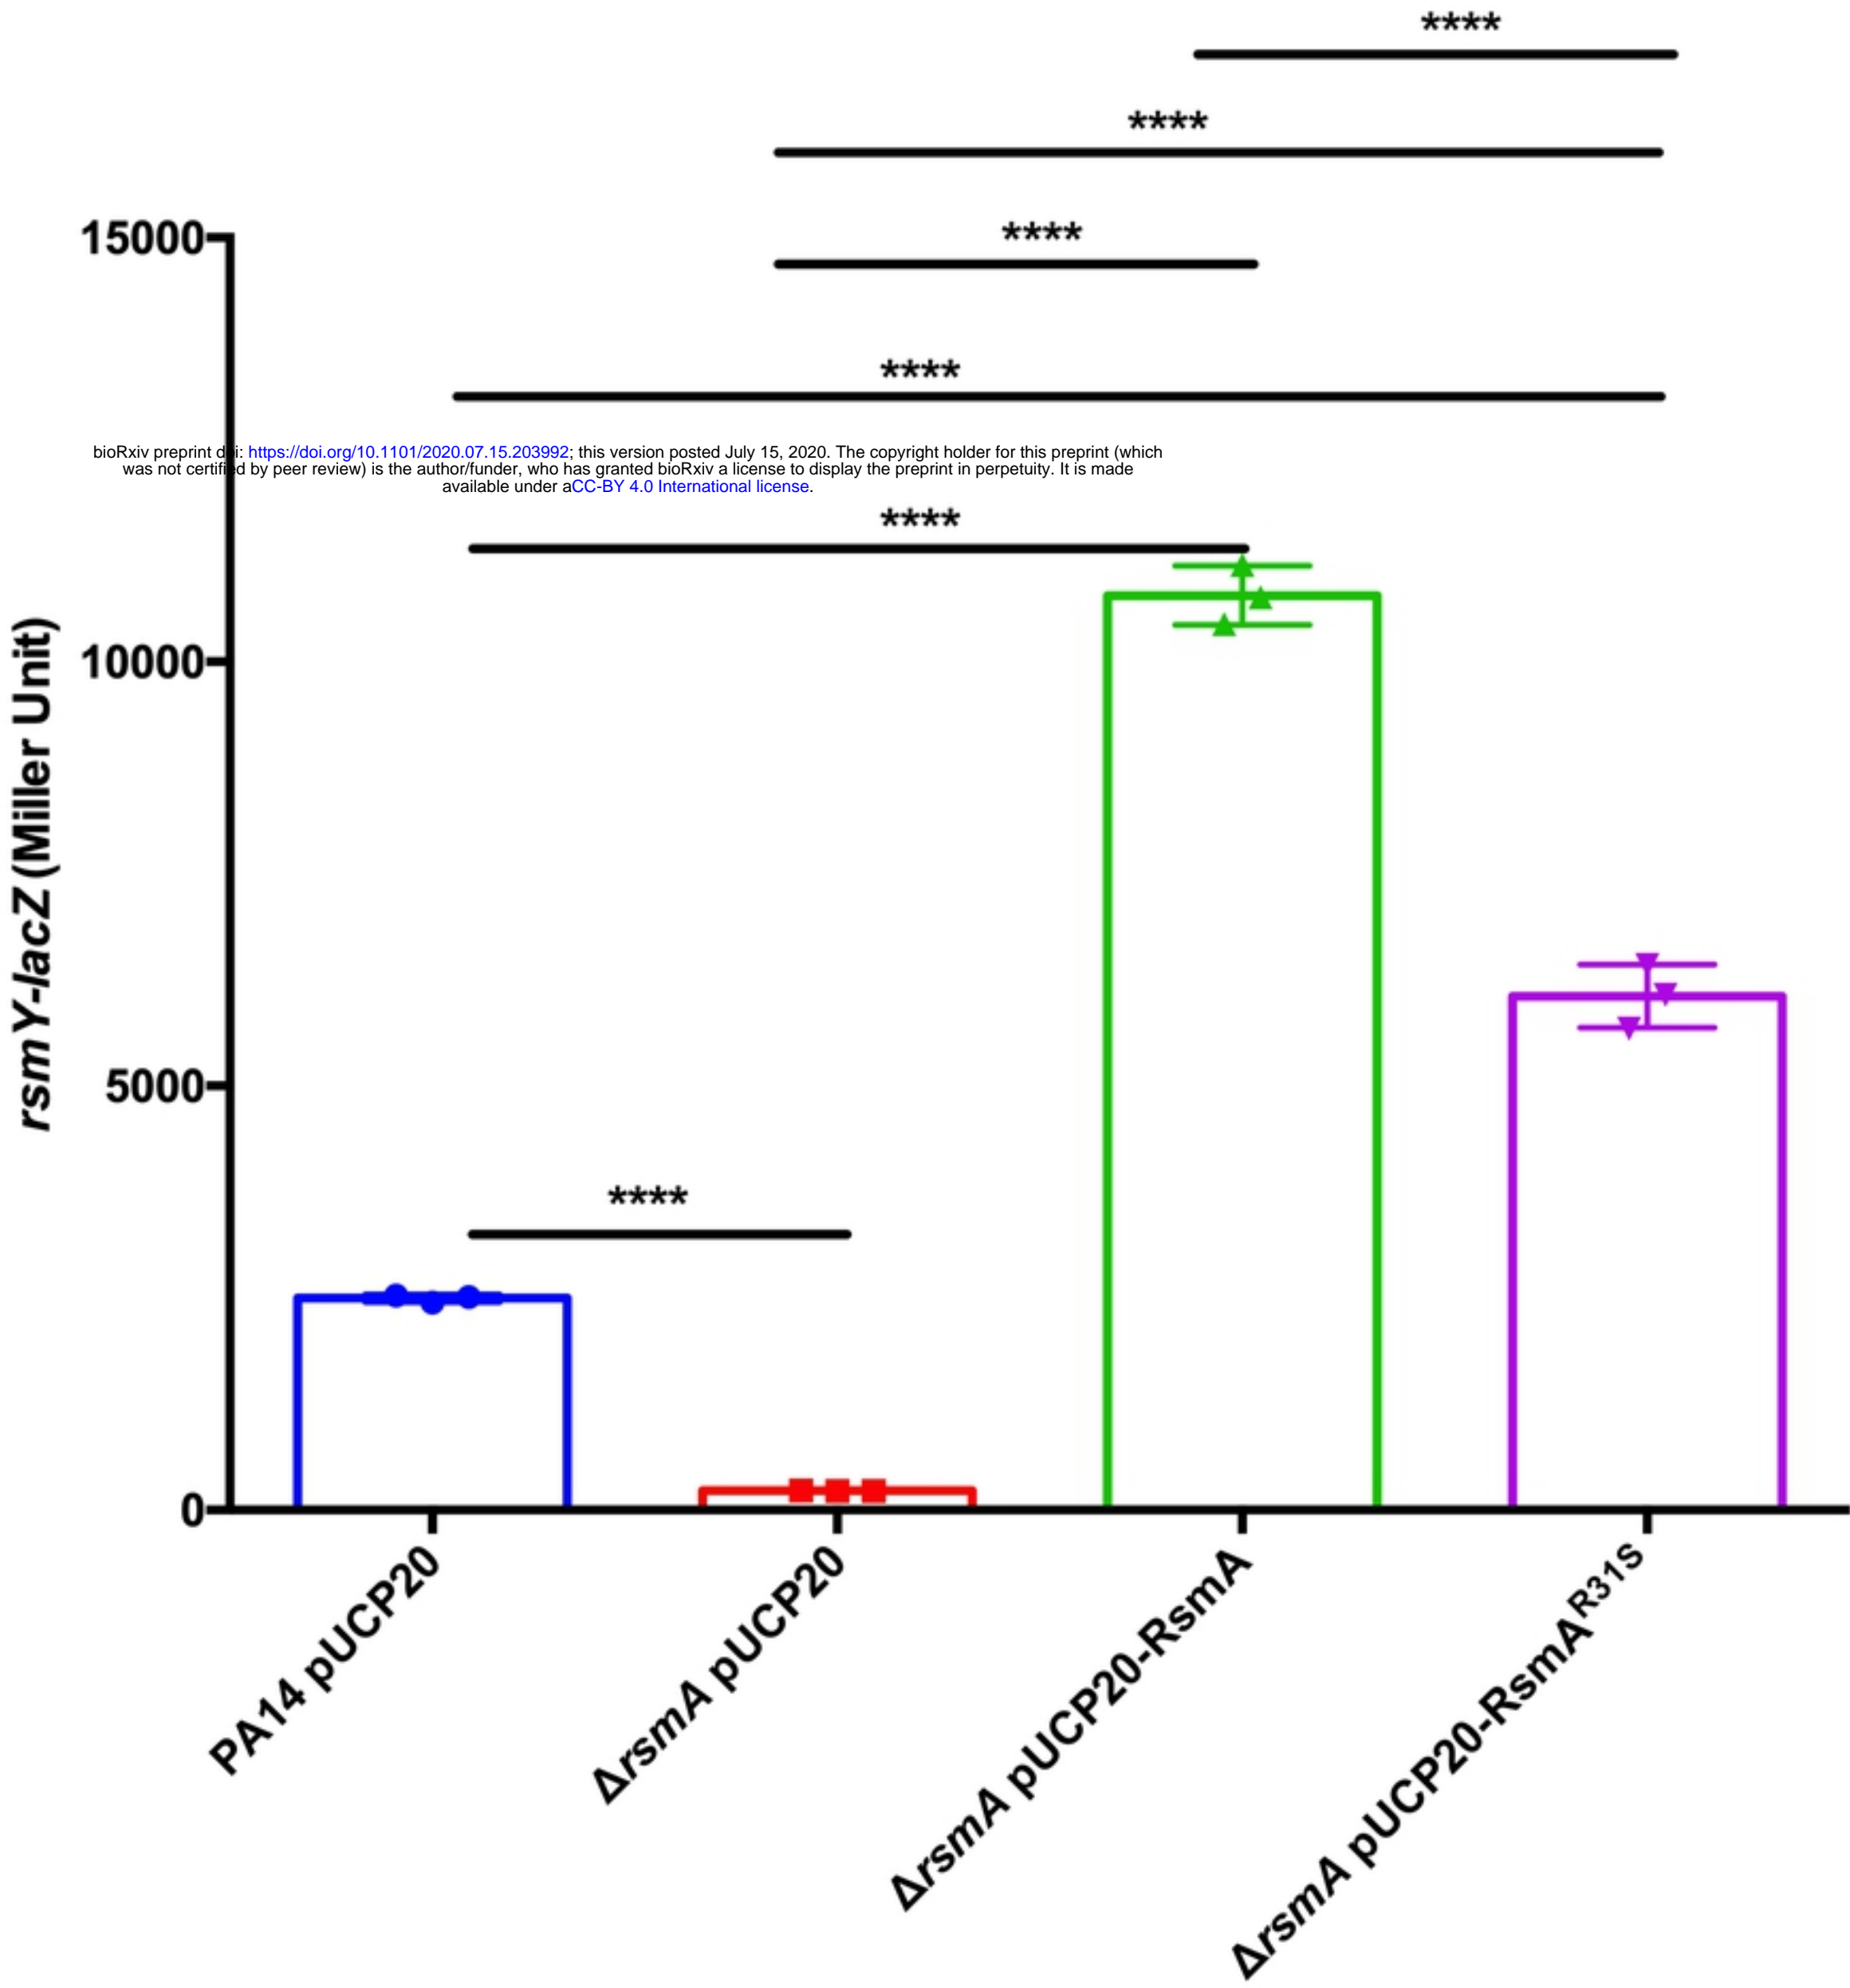

Figure 3

**A**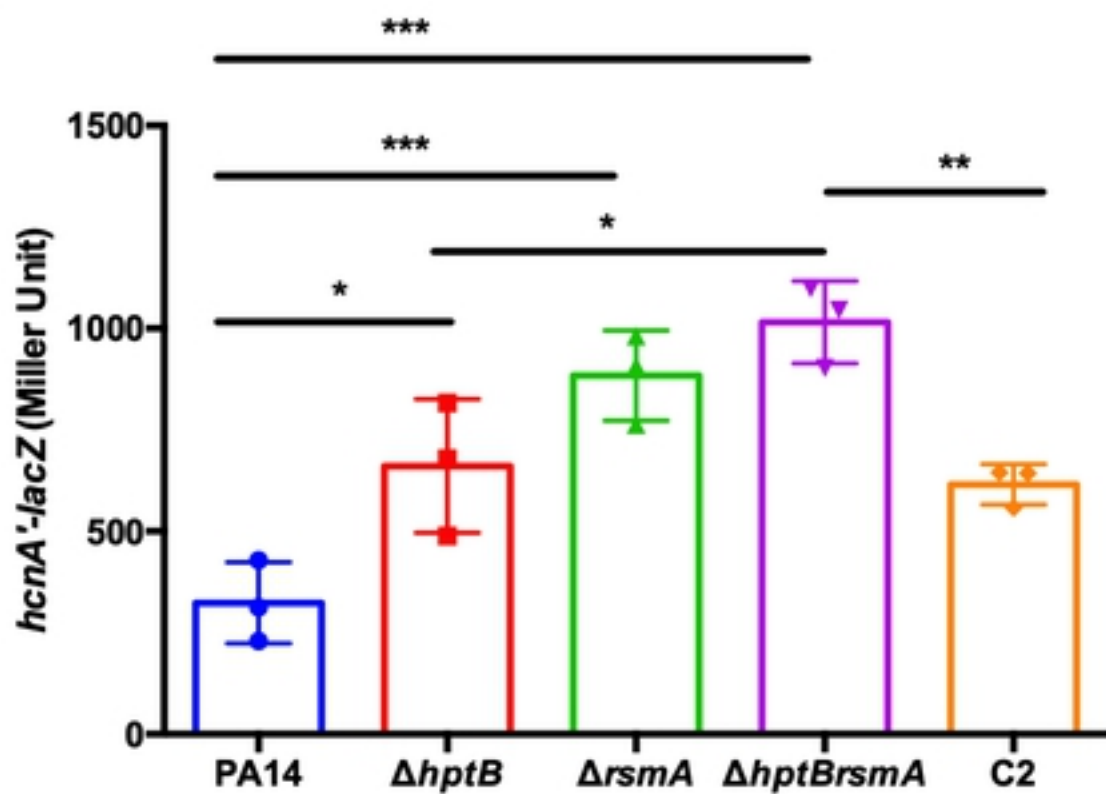**B**

bioRxiv preprint doi: <https://doi.org/10.1101/2020.07.15.203992>; this version posted July 15, 2020. The copyright holder for this preprint (which was not certified by peer review) is the author/funder, who has granted bioRxiv a license to display the preprint in perpetuity. It is made available under aCC-BY 4.0 International license.

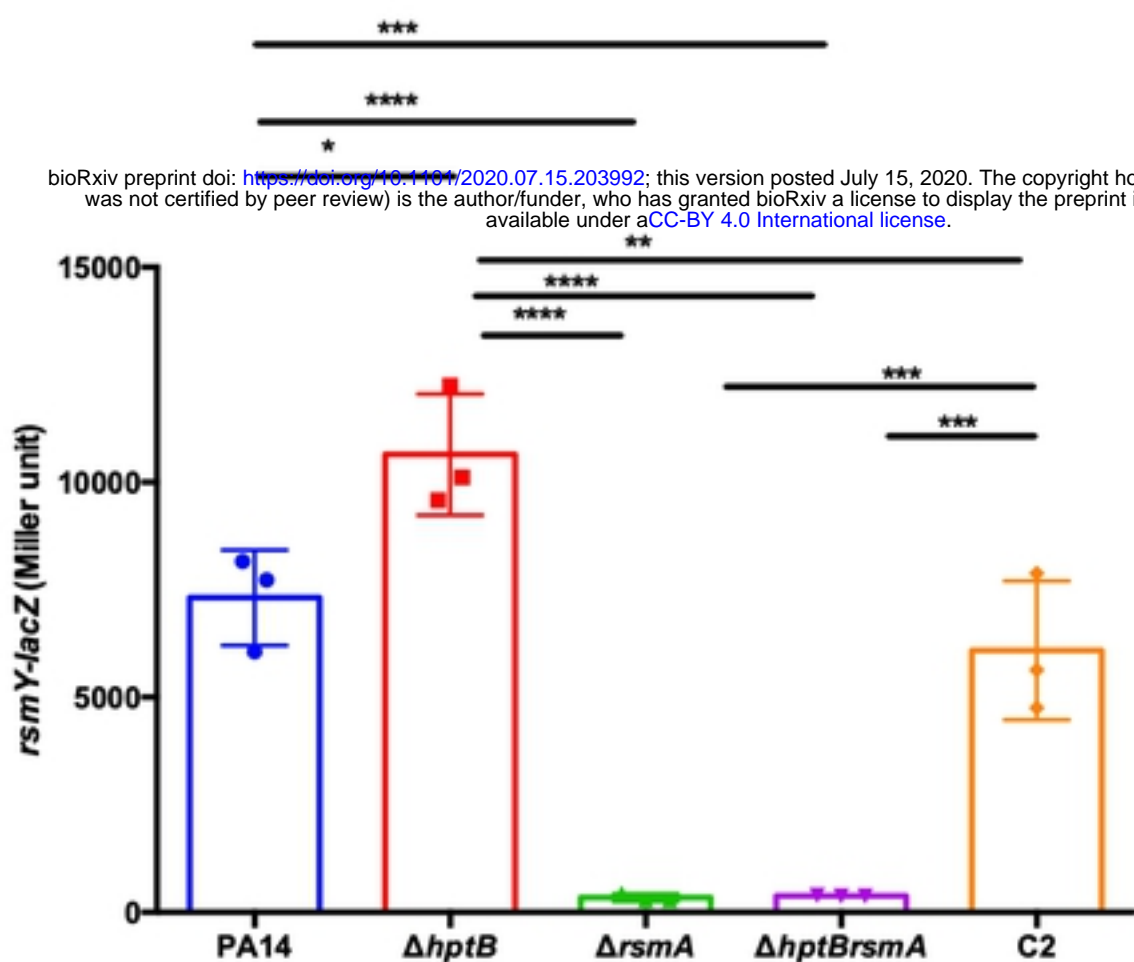**C**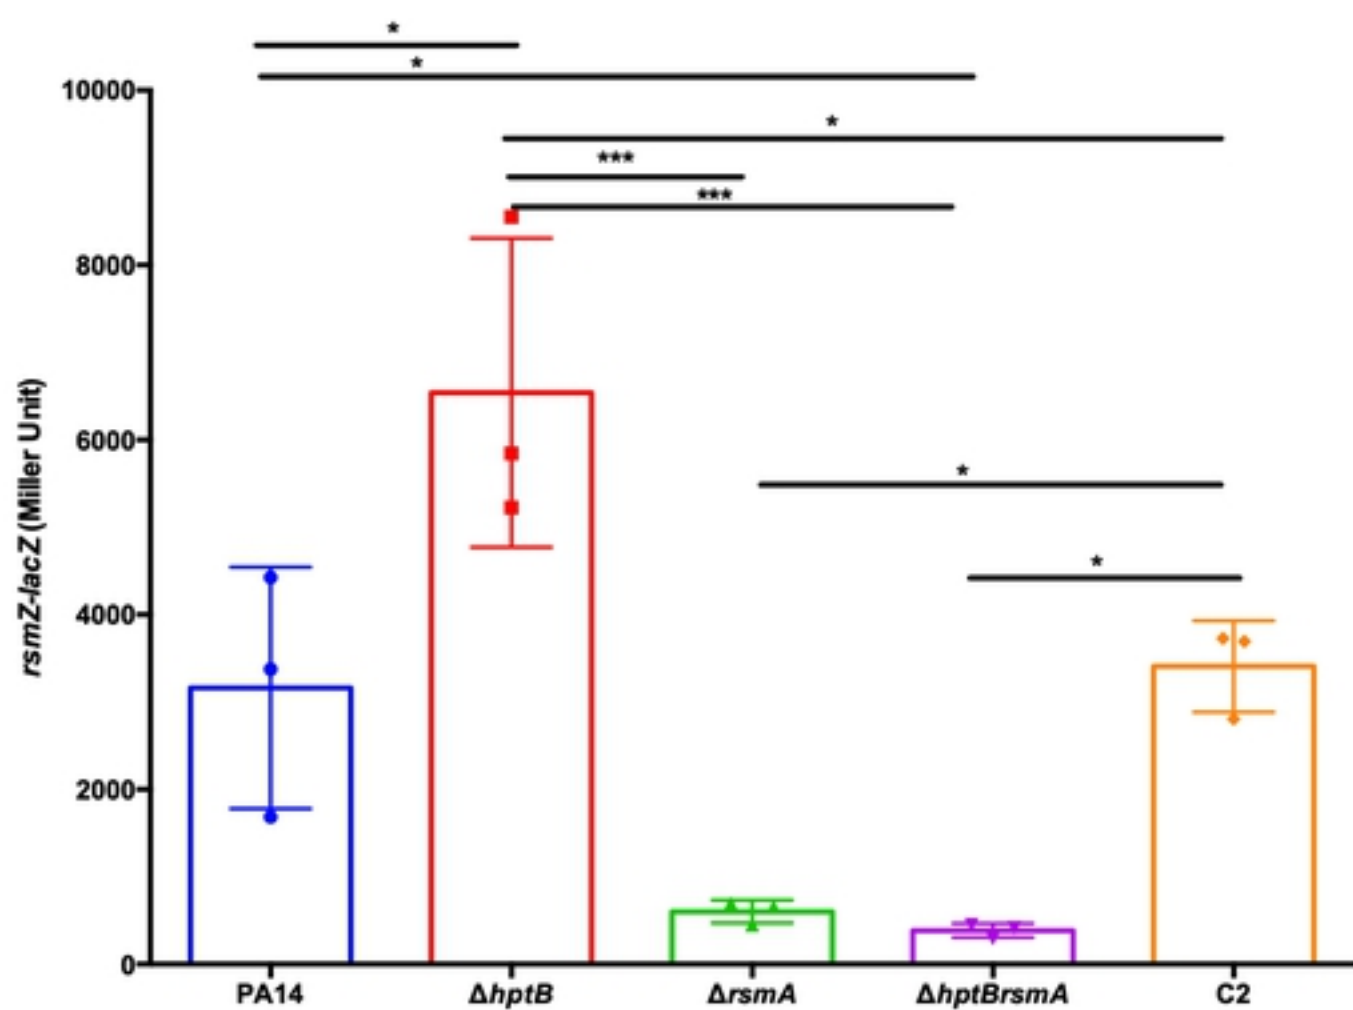

Figure 4

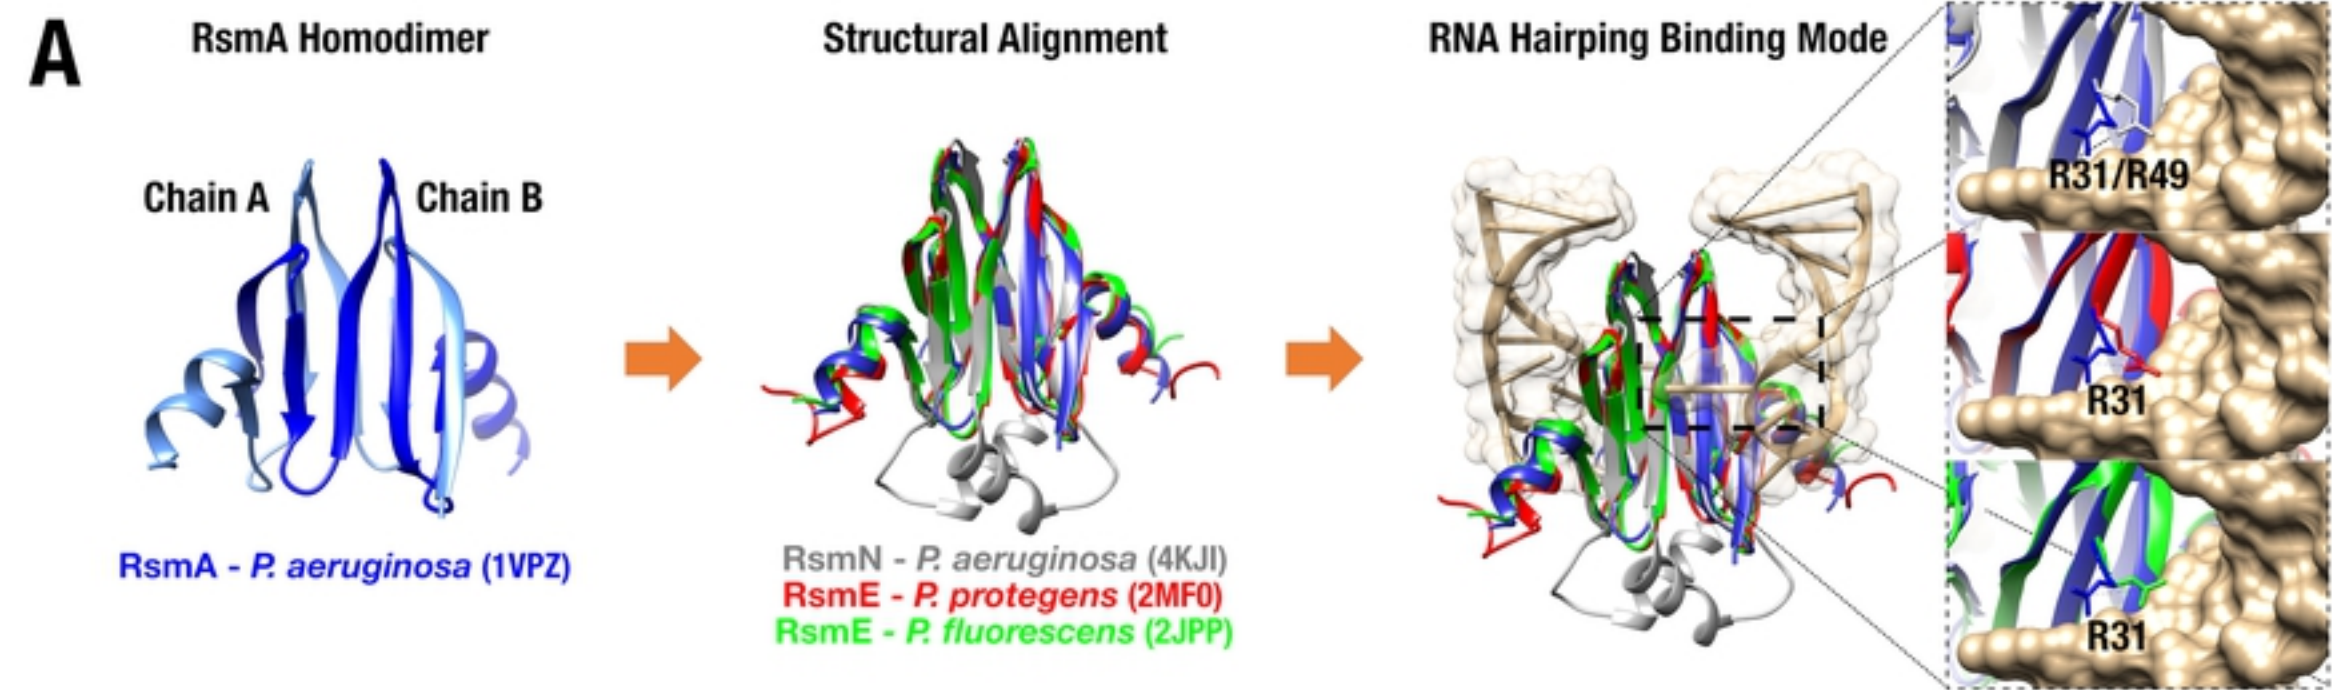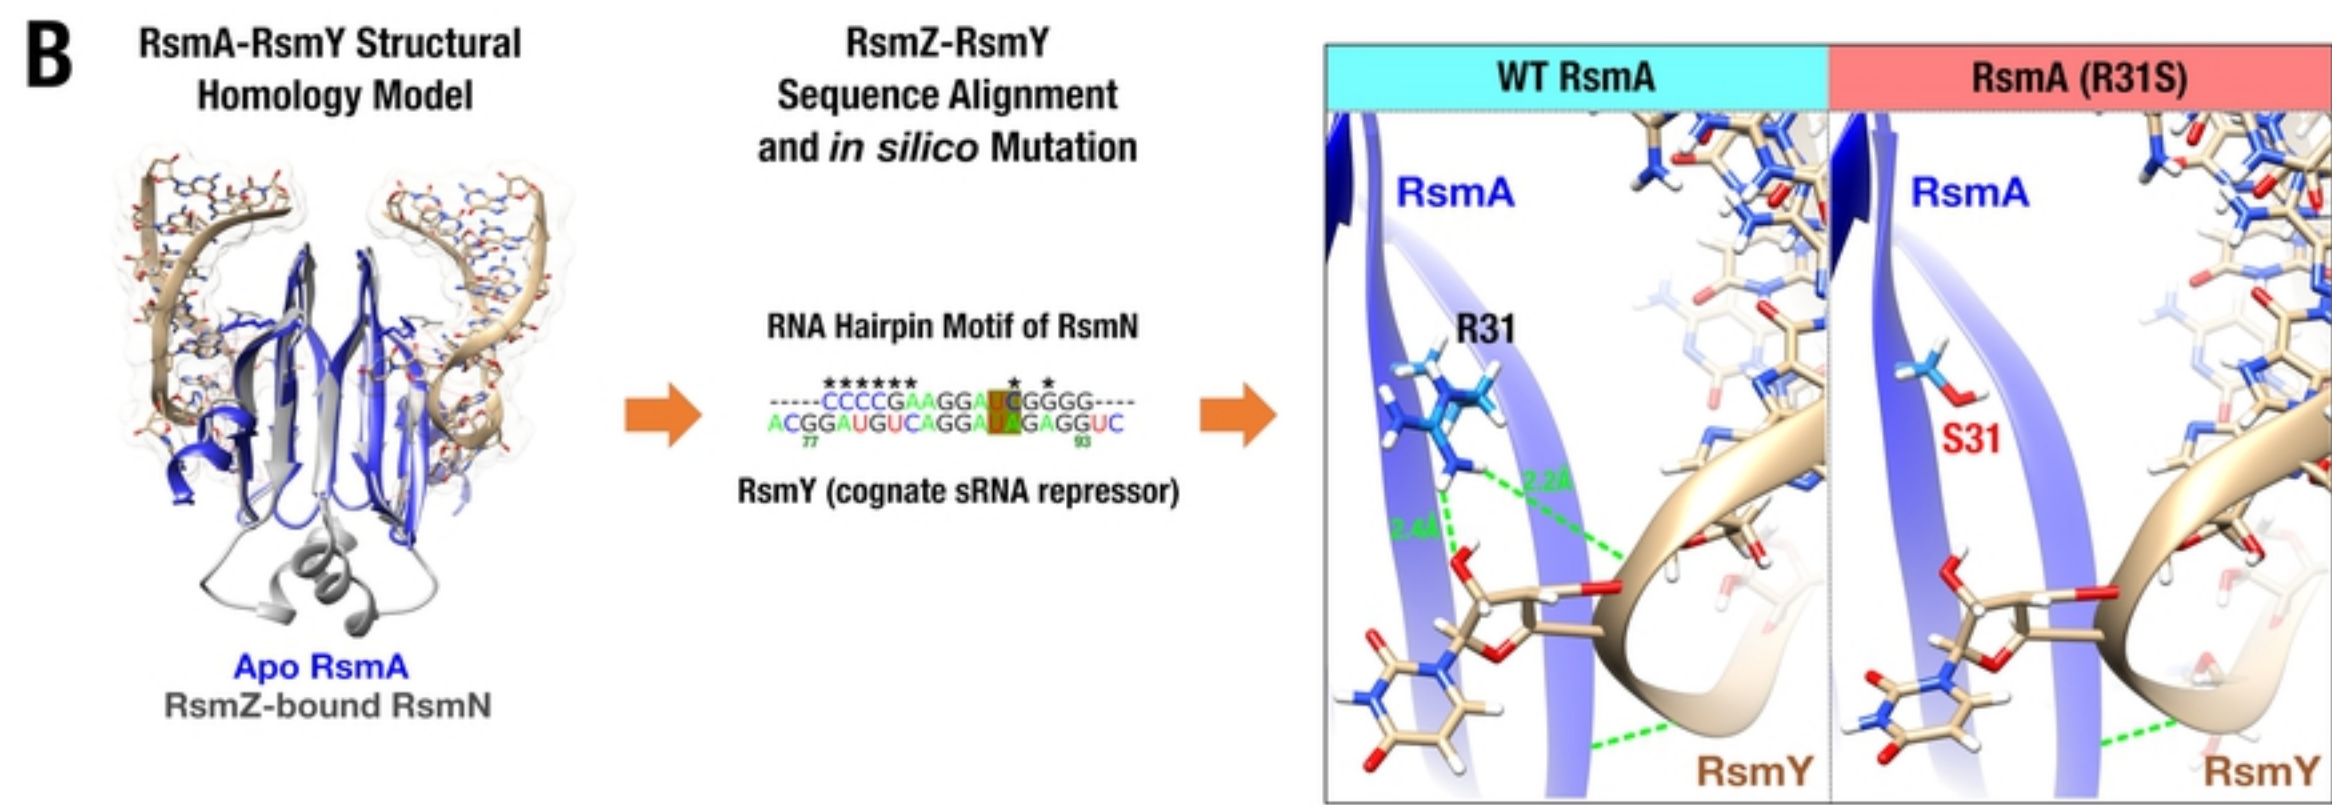

Figure 5



**RsmA**

**RsmA<sup>R31S</sup>**

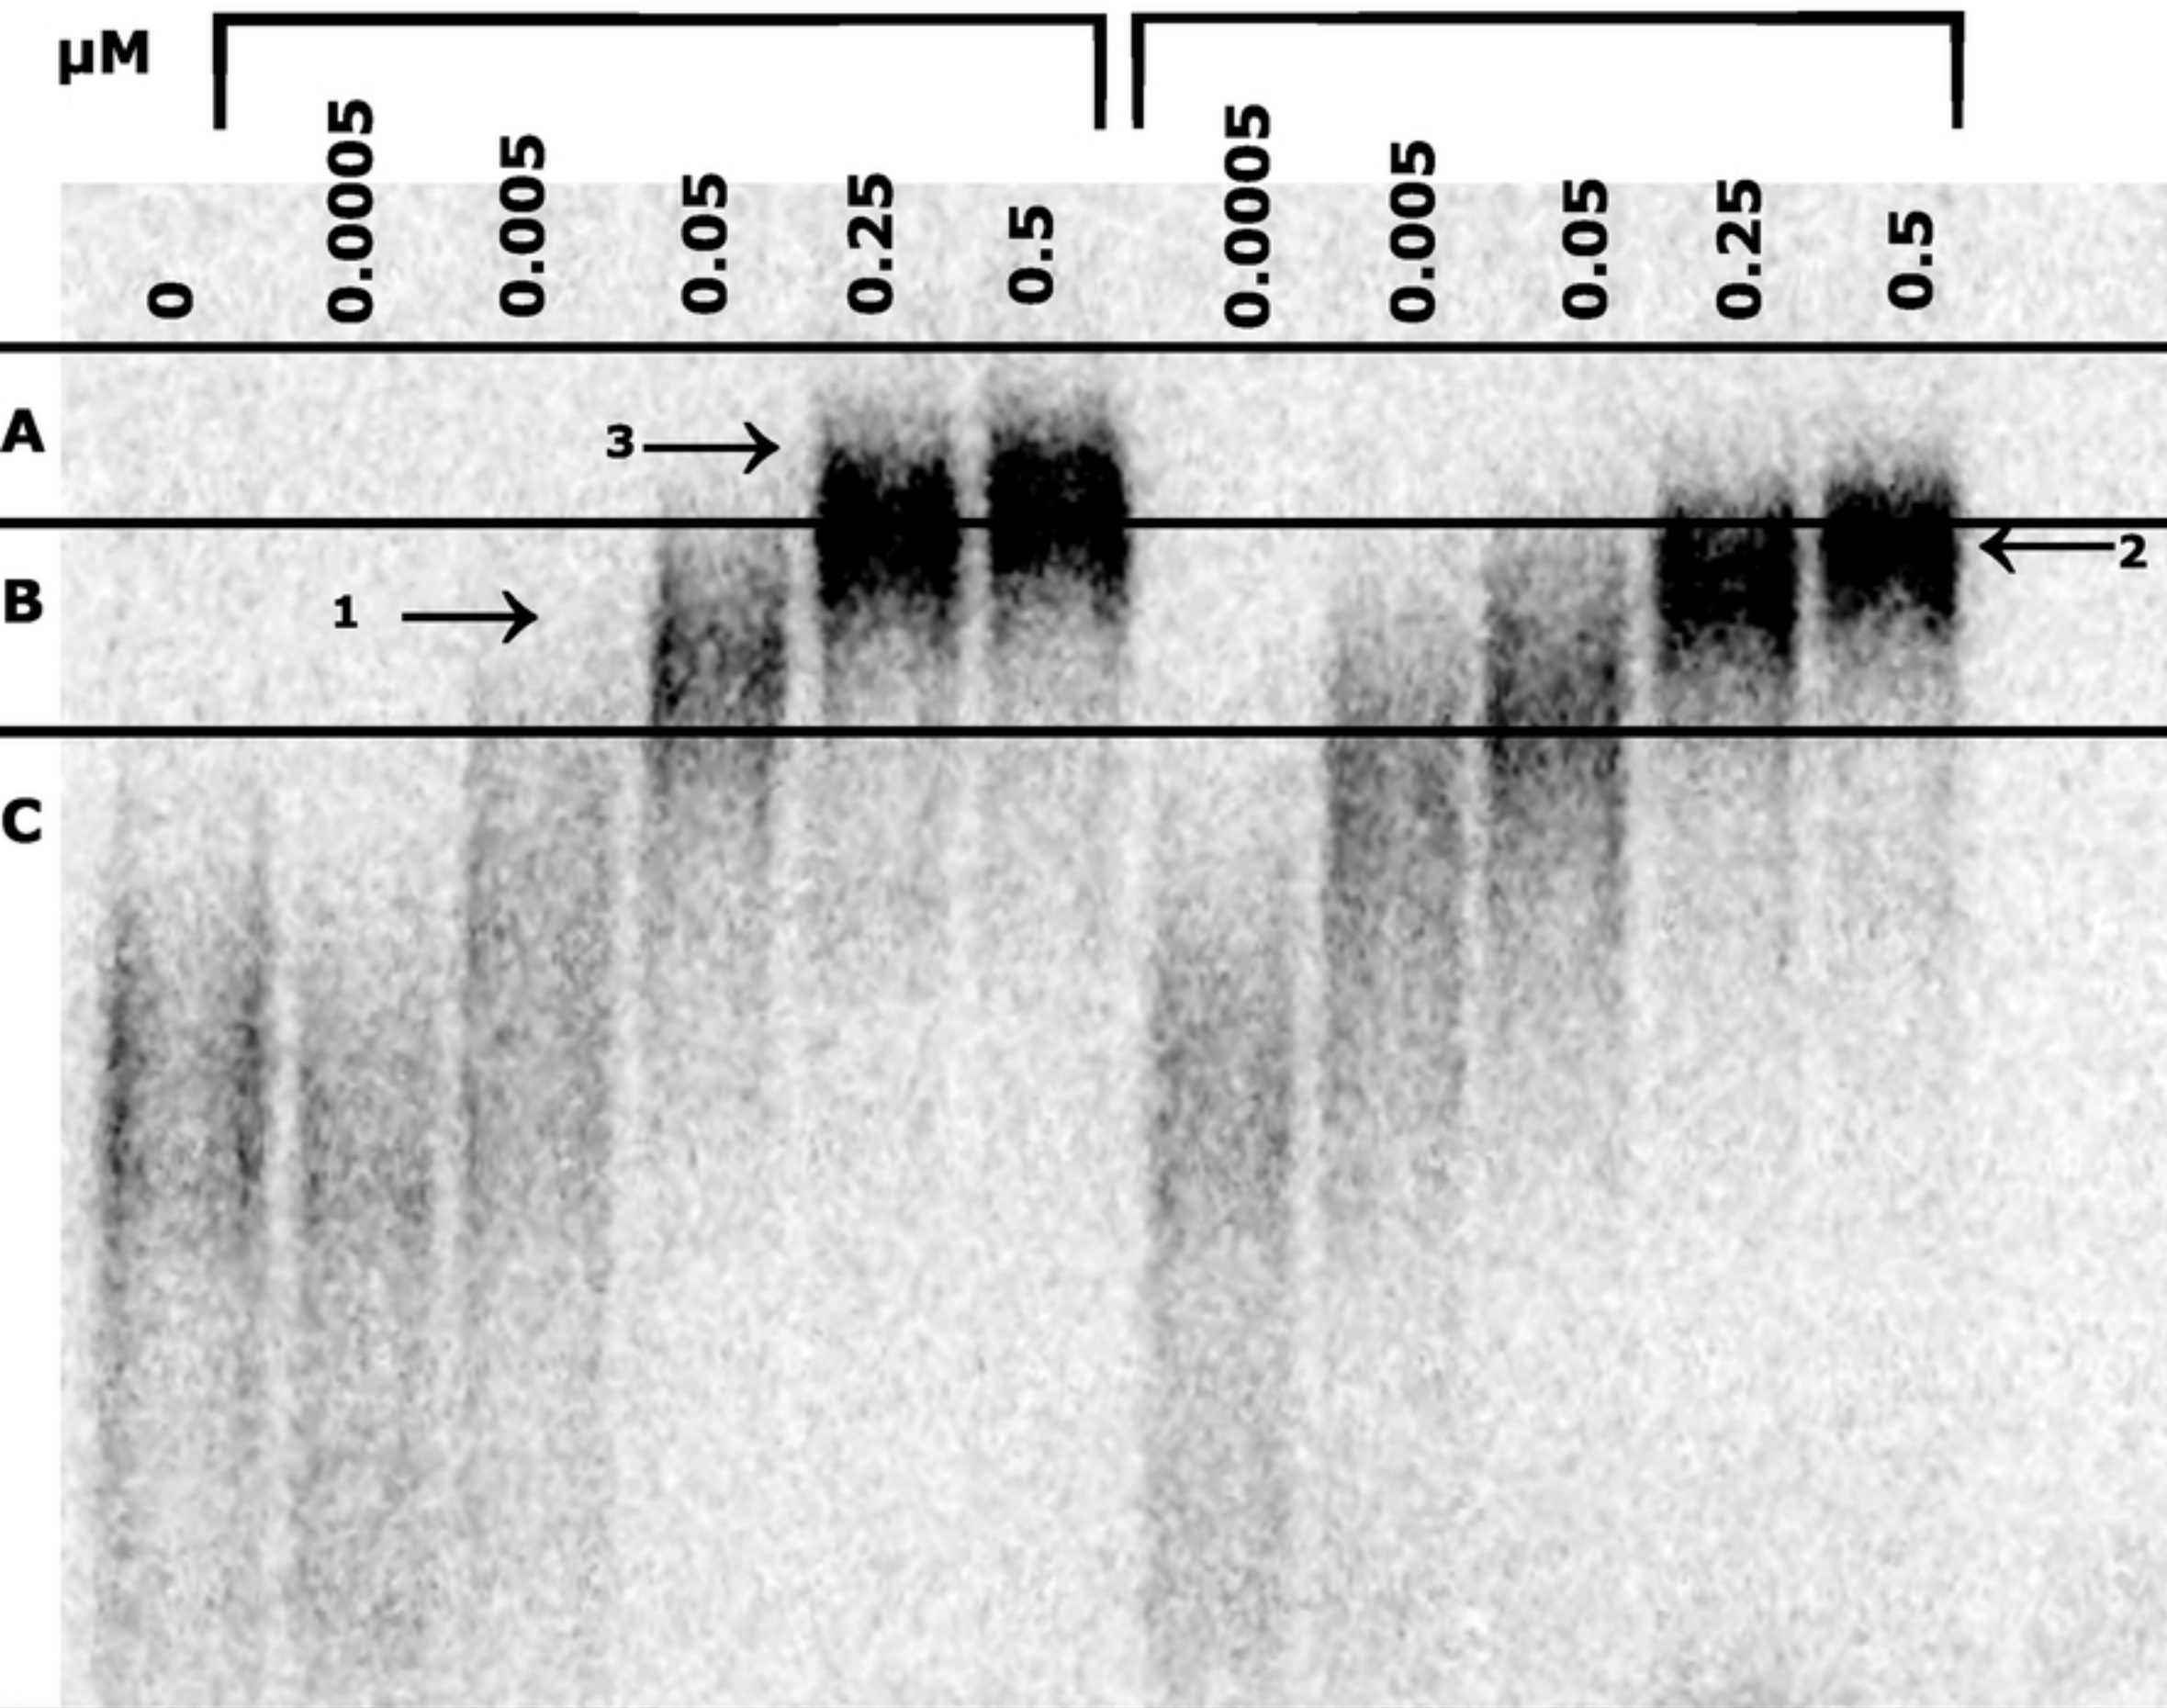

Figure 6
